# Supplementary material for: Compound green tea (CGT) regulates lipid metabolism in high-fat diet induced mice
Source: Royal Society of Chemistry journal article supplement (doi:10.1039/d2ra02831j), 2022-01-01

Electronic Supplementary Material (ESI) for RSC Advances.  
This journal is © The Royal Society of Chemistry 2022

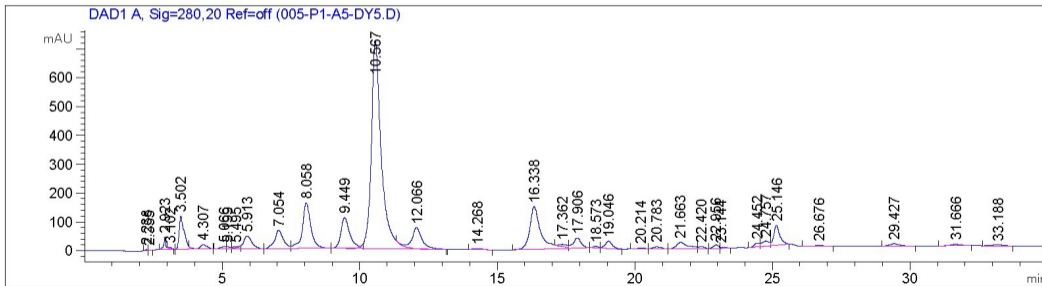

Supplement: d2ra02831j1.pdf [file d2ra02831j1.pdf]
