# Supplementary material for: Compound green tea (CGT) regulates lipid metabolism in high-fat diet induced mice
Source: Royal Society of Chemistry journal article supplement (doi:10.1039/d2ra02831j), 2022-01-01
Supplement: d2ra02831j6.xlsx [file d2ra02831j6.xlsx]

## Sheet: Sheet1
Compounds	Class	Content	Ion mode	Molecular Weight (Da)	Ionization model	Q1 (Da)	Q3 (Da)
Putrescine	Alkaloids	147000	Positive	88.1	[M+H]+	89.11	72.08
Phenol	Phenolic acids	52100	Negative	94.042	[M-H]-	93.03	75.02
Methanesulfonic acid	Organic acids	61900	Negative	95.988	[M-H]-	94.98	79.96
Succinic anhydride	Organic acids	45900	Positive	100.018	[M+H]+	101.02	55.02
1-Aminocyclopropane-1-carboxylic acid	Organic acids	66400	Positive	101.048	[M+H]+	102.05	56.05
L-Azetidine-2-carboxylic acid	Amino acids and derivatives	56700	Positive	101.1	[M+H]+	102.05	56.05
N,N-Dimethylglycine	Amino acids and derivatives	114000	Positive	103.063	[M+H]+	104.07	86
γ-Aminobutyric acid	Organic acids	293000	Positive	103.063	[M+H]+	104.07	68.8
Methyl 3-aminopropanoate	Amino acids and derivatives	304000	Positive	103.063	[M+H]+	104.07	59.01
2-Aminoisobutyric acid	Organic acids	192000	Positive	103.063	[M+H]+	104.07	58
Choline	Alkaloids	3010000	Positive	103.091	[M+H]+	104.1	60.1
Tartronate semialdehyde	Organic acids	51400	Negative	104.011	[M-H]-	103	59.01
Hydroxypyruvic acid	Organic acids	49900	Negative	104.011	[M-H]-	103	59.01
Malonic acid	Organic acids	606000	Negative	104.06	[M-H]-	103	59
L-Serine	Amino acids and derivatives	99700	Positive	105.043	[M+H]+	106	60
4-Aminophenol	Alkaloids	95800	Positive	109.053	[M+H]+	110.06	93.06
Cytosine	Nucleotides and derivatives	88000	Positive	111.043	[M+H]+	112.05	95
Histamine	Alkaloids	156000	Positive	111.08	[M+H]+	112.09	95
Pterolactam	Alkaloids	13000000	Positive	115.063	[M+H]+	116.07	70.07
L-Proline	Amino acids and derivatives	12000000	Positive	115.063	[M+H]+	116.07	70.1
Fumaric acid	Organic acids	30000	Negative	116.011	[M-H]-	115	71
3-Methyl-2-Oxobutanoic acid	Organic acids	44200	Negative	116.047	[M-H]-	115.04	71
Indole	Alkaloids	113000	Positive	117.058	[M+H]+	118.07	91
Betaine	Alkaloids	1170000	Positive	117.079	[M+H]+	118.09	58.07
L-Valine	Amino acids and derivatives	12100000	Positive	117.079	[M+H]+	118.09	72.1
N-Methyl-α-aminoisobutyric acid	Amino acids and derivatives	25800	Positive	117.079	[2M+H]+	235.16	118.09
Succinic acid	Organic acids	6520000	Negative	118.027	[M-H]-	117.02	73
Methylmalonic acid	Organic acids	6180000	Negative	118.027	[M-H]-	117.02	73
β-Hydroxyisovaleric acid	Organic acids	175000	Negative	118.063	[M-H]-	117.06	59
Aminomalonic acid	Organic acids	274000	Negative	119.022	[M-H]-	118	74
L-Threonine	Amino acids and derivatives	140000	Positive	119.058	[M+H]+	120.07	74
L-Homoserine	Amino acids and derivatives	507000	Positive	119.058	[M+H]+	120.07	74.1
N-Benzylmethylene isomethylamine	Alkaloids	4290000	Positive	119.073	[M+H]+	120.08	103.05
D-(-)-Threose	Others	31500	Positive	120.042	[M+H]+	121.04	93.06
4-Methylbenzaldehyde	Others	38700	Negative	120.058	[M-H]-	119.05	93.03
(S)-2-Phenyloxirane	Others	1750000	Positive	120.058	[M+H]+	121.06	77.04
Benzamide	Phenolic acids	738000	Positive	121.053	[M+H]+	122	105
Phenethylamine	Alkaloids	6800000	Positive	121.089	[M+H]+	122.1	105
benzoic Acid	Phenolic acids	121000	Positive	122.037	[M+H]+	123.04	79
2-Hydroxybenzaldehyde (Salicylaldehyde)	Phenolic acids	35100	Negative	122.037	[M-H]-	121.03	77.04
4-Hydroxybenzaldehyde	Phenolic acids	1050000	Negative	122.037	[M-H]-	121.03	92
Nicotinamide	Others	3340000	Positive	122.048	[M+H]+	123.06	80.05
2-Picolinic acid	Organic acids	270000	Negative	123.032	[M-H]-	122.03	78
Isonicotinic acid*	Others	276000	Positive	123.032	[M+H]+	124.04	78.03
Nicotinic acid (Vitamin B3)*	Others	226000	Positive	123.032	[M+H]+	124.04	78
N-Ethylmaleimide (NEM)	Amino acids and derivatives	71000	Positive	125.13	[M+H]+	126.05	80.01
Thymine	Nucleotides and derivatives	25800	Positive	126.043	[M+H]+	127.05	110
Imidazol-1-yl-acetic acid	Organic acids	24800	Positive	126.11	[M+H]+	127.05	81.04
Cyclo(Ala-Gly)	Amino acids and derivatives	1420000	Positive	128.059	[M+H]+	129.07	56.05
5-Oxoproline	Amino acids and derivatives	21700	Negative	129.043	[M-H]-	128.04	82.03
5-Oxo-L-Proline	Amino acids and derivatives	35800	Negative	129.043	[M-H]-	128.04	82.03
Cycloleucine	Amino acids and derivatives	7320000	Positive	129.079	[M+H]+	130.09	84.08
L-Pipecolic Acid	Organic acids	4150000	Positive	129.079	[M+H]+	130.09	84.08
4-Guanidinobutanal	Others	7960000	Positive	129.09	[M+H]+	130.09	84.08
Methylenesuccinic acid	Organic acids	28000	Negative	130.027	[M-H]-	129.02	85.03
N-Acetylputrescine	Alkaloids	568000	Positive	130.111	[M+H]+	131.12	114.09
Agmatine	Alkaloids	344000	Positive	130.122	[M+H]+	131.13	114.1
5-Aminolevulinate	Alkaloids	584000	Positive	131.058	[M+H]+	132.1	86.1
Trans-4-Hydroxy-L-proline	Amino acids and derivatives	1910000	Positive	131.058	[M+H]+	132.07	86
L-Allo-isoleucine*	Amino acids and derivatives	5770000	Positive	131.095	[M+H]+	132	86
6-Deoxyfagomine	Alkaloids	471000	Positive	131.095	[M+H]+	132.1	57.1
L-Isoleucine*	Amino acids and derivatives	12400000	Positive	131.095	[M+H]+	132.1	86
6-Aminocaproic acid	Organic acids	564000	Positive	131.095	[M+H]+	132.1	69
L-Norleucine*	Amino acids and derivatives	34800000	Positive	131.095	[M+H]+	132.1	86
L-Leucine*	Amino acids and derivatives	29100000	Positive	131.095	[M+H]+	132.1	86.2
2-Methylsuccinic acid	Organic acids	1080000	Negative	132.042	[M-H]-	131.03	87.05
Dimethylmalonic acid	Organic acids	113000	Negative	132.042	[M-H]-	131.03	87.05
2-Hydroxy-2-methyl-3-oxobutanoic acid	Organic acids	94500	Negative	132.042	[M-H]-	131.03	87.04
Glutaric acid	Organic acids	532000	Negative	132.042	[M-H]-	131.03	87.05
L-Asparagine	Amino acids and derivatives	155000	Positive	132.054	[M+H]+	133.06	74
4-Aminoindole	Alkaloids	148000	Positive	132.069	[M+H]+	133.1	105.1
2-Hydroxyisocaproic acid	Organic acids	207000	Negative	132.079	[M-H]-	131.07	85
6-Hydroxyhexanoic acid	Organic acids	59900	Negative	132.079	[M-H]-	131.07	85.07
L-Ornithine	Amino acids and derivatives	21200	Positive	132.09	[M+H]+	133	116
L-Aspartic Acid	Amino acids and derivatives	559000	Negative	133.038	[M-H]-	132.03	88
Iminodiacetic acid	Organic acids	67700	Negative	133.038	[M-H]-	132.03	88.04
L-Malic acid	Organic acids	12900000	Negative	134.022	[M-H]-	133.01	71.01
3-Dehydro-L-Threonic Acid	Others	3270000	Negative	134.022	[M-H]-	133.01	71.01
2,3-Dihydroxy-3-Methylbutanoic Acid	Organic acids	1470000	Negative	134.058	[M-H]-	133.05	71.01
2-Benzoxazolinone	Others	21300	Positive	135.032	[M+H]+	136.04	80.06
S-Methyl-L-cysteine	Amino acids and derivatives	225000	Positive	135.035	[M+H]+	136.04	91.05
Adenine	Nucleotides and derivatives	4280000	Positive	135.054	[M+H]+	136.06	119
2-Aminopurine	Nucleotides and derivatives	279000	Positive	135.054	[M+H]+	136.06	118.9
N-benzylformamide	Alkaloids	189000	Positive	135.068	[M+H]+	136.07	91.05
D-Threonic Acid	Others	738000	Negative	136.037	[M-H]-	135.03	75.01
Hypoxanthine	Nucleotides and derivatives	42000	Positive	136.039	[M+H]+	137.05	119
Allopurinol	Nucleotides and derivatives	37800	Positive	136.039	[M+H]+	137.05	110
4-Methylbenzoic acid	Phenolic acids	135000	Positive	136.052	[M+H]+	137.06	77.04
Phenyl acetate	Phenolic acids	152000	Negative	136.052	[M-H]-	135.05	92.03
Trigonelline	Alkaloids	2850000	Positive	137.048	[M+H]+	138.06	94.07
L-Tyramine	Alkaloids	661000	Positive	137.084	[M+H]+	138.09	103
Phenylethanolamine	Alkaloids	156000	Positive	137.084	[M+H]+	138.09	121.1
Salicylic acid	Phenolic acids	2210000	Negative	138.032	[M-H]-	137.03	108.02
4-Hydroxybenzoic acid	Phenolic acids	3640000	Negative	138.032	[M-H]-	137.02	93
2,5-Dihydroxybenzaldehyde	Phenolic acids	2170000	Negative	138.032	[M-H]-	137.02	93.03
Protocatechualdehyde	Phenolic acids	2000000	Negative	138.032	[M-H]-	137.02	93.04
Tyrosol; 4-Hydroxyphenylethanol	Phenolic acids	221000	Negative	138.068	[M-H]-	137.06	119.05
4-Nitrophenol	Phenolic acids	2930000	Positive	139.027	[M+H]+	140	99
2-Nitrophenol	Phenolic acids	327000	Negative	139.027	[M-H]-	138.02	108.02
Histidinol	Alkaloids	6820000	Positive	141.09	[M+H]+	142.1	124.09
Muconic acid	Organic acids	2790000	Negative	142.027	[M-H]-	141.02	59
2-Amino-4,5-dihydro-1H-imidazole-4-acetic acid	Alkaloids	242000	Positive	143.069	[M+H]+	144.08	84.06
L-Cyclopentylglycine	Amino acids and derivatives	320000	Positive	143.095	[M+H]+	144.1	98.09
1-Methylpiperidine-2-carboxylic acid	Organic acids	515000	Positive	143.095	[M+H]+	144.1	84.08
Stachydrine	Alkaloids	368000	Positive	143.095	[M+H]+	144.1	58.06
Methyl L-pyroglutamate	Alkaloids	376000	Positive	143.14	[M+H]+	144.07	84.04
D-Proline betaine	Amino acids and derivatives	239000	Positive	144.092	[M]+	144.1	84.08
Indole-3-carboxaldehyde	Alkaloids	58500	Positive	145.053	[M+H]+	146.06	118.06
Allysine(6-Oxo DL-Norleucine)	Amino acids and derivatives	58000	Negative	145.074	[M-H]-	144.1	126
N-Methyl-Trans-4-Hydroxy-L-Proline	Amino acids and derivatives	576000	Positive	145.074	[M+H]+	146.08	82.07
4-Acetamidobutyric acid	Organic acids	206000	Positive	145.074	[M+H]+	146.08	86
4-Guanidinobutyric acid	Organic acids	415000	Positive	145.085	[M+H]+	146.09	87
α-Ketoglutaric acid	Organic acids	26100	Negative	146.022	[M-H]-	145.01	101
Adipic Acid	Organic acids	349000	Negative	146.058	[M-H]-	145.05	101
2-Methylglutaric acid	Organic acids	350000	Negative	146.058	[M-H]-	145.05	101
L-Glutamine	Amino acids and derivatives	306000	Positive	146.069	[M+H]+	147.08	84
L-Lysine	Amino acids and derivatives	309000	Positive	146.106	[M+H]+	147.11	84
O-Acetylserine	Amino acids and derivatives	423000	Positive	147.053	[M+H]+	148.06	88
L-Glutamic acid	Amino acids and derivatives	3990000	Positive	147.053	[M+H]+	148.06	84
L-threo-3-Methylaspartate	Amino acids and derivatives	64300	Negative	147.053	[M-H]-	146.05	102.06
4-Hydroxyisoleucine	Amino acids and derivatives	19700	Positive	147.17	[M+H]+	148.1	74.02
2-Hydroxyglutaric Acid	Organic acids	232000	Negative	148.037	[M-H]-	147.03	57.03
2-Dehydro-3-deoxy-L-arabinonate	Others	241000	Negative	148.037	[M-H]-	147.03	57.03
3-Methylmalic acid	Organic acids	29500	Negative	148.037	[M-H]-	147.03	57.03
L-Citramalic acid	Organic acids	311000	Negative	148.037	[M-H]-	147.03	87.1
D-Arabinono-1,4-lactone	Others	98400	Negative	148.037	[M-H]-	147.03	85.03
Mevalonic acid	Organic acids	223000	Negative	148.074	[M-H]-	147.07	59.01
1-Methyladenine	Nucleotides and derivatives	20700	Positive	149.07	[M+H]+	150.08	133
L-Tartaric acid	Organic acids	210000	Negative	150.016	[M-H]-	149.01	87
D-Ribose*	Others	53300	Negative	150.053	[M-H]-	149.05	75.01
D-Arabinose*	Others	101000	Negative	150.053	[M-H]-	149.05	59.01
Benzyl acetate	Organic acids	139000	Negative	150.068	[M-H]-	149.06	74.9
2-Acetyl-3-ethylpyrazine	Alkaloids	379000	Positive	150.079	[M+H]+	151.09	109.08
L-Xylose*	Others	65200	Negative	150.13	[M-H]-	149.05	59.02
Guanine	Nucleotides and derivatives	354000	Positive	151.049	[M+H]+	152.06	135
Isoguanine	Nucleotides and derivatives	65600	Positive	151.049	[M+H]+	152.06	135
Xanthine	Nucleotides and derivatives	88200	Negative	152.033	[M-H]-	151.03	151
8-Azaguanine	Nucleotides and derivatives	68400	Positive	152.045	[M+H]+	153.05	136.03
2-Hydroxyphenylacetic acid	Organic acids	44800	Negative	152.047	[M-H]-	151.04	107.05
Mandelic acid	Phenolic acids	30300	Negative	152.047	[M-H]-	151.04	107
3-hydroxyphenylacetic acid	Phenolic acids	36300	Negative	152.047	[M-H]-	151.04	107.05
Vanillin	Phenolic acids	240000	Negative	152.047	[M-H]-	151.04	136
D-Arabitol	Others	23700	Negative	152.068	[M-H]-	151.06	71
Isovanillin	Phenolic acids	133000	Positive	152.15	[M+H]+	153.05	65.04
4-Hydroxyphenylacetic acid	Phenolic acids	47300	Negative	152.15	[M-H]-	151.04	107.05
Dopamine	Alkaloids	73200	Positive	153.079	[M+H]+	154.09	137
2,5-Dihydroxybenzoic acid; Gentisic Acid*	Phenolic acids	4090000	Negative	154.027	[M-H]-	153.02	109.03
3,4-Dihydroxybenzoic acid (Protocatechuic acid)*	Phenolic acids	9620000	Negative	154.027	[M-H]-	153.02	109.03
2,3-Dihydroxybenzoic Acid*	Phenolic acids	8800000	Negative	154.027	[M-H]-	153.02	109.03
Hydroxytyrosol	Phenolic acids	1210000	Negative	154.063	[M-H]-	153.06	123.05
3,5-Dimethoxyphenol	Phenolic acids	25300	Negative	154.16	[M-H]-	153.06	138.03
L-Histidine	Amino acids and derivatives	46800	Positive	155.069	[M+H]+	156.08	110
Orotic acid	Others	41000	Negative	156.017	[M-H]-	155.01	111
TranexamicAcid	Organic acids	149000	Positive	157.11	[M+H]+	158.12	95.09
1-Decanol	Others	4740000	Negative	158.167	[M-H]-	157.16	157.2
Tryptamine	Alkaloids	661000	Positive	160.1	[M+H]+	161.11	144
Indole-3-carboxylic acid	Alkaloids	342000	Negative	161.048	[M-H]-	160.04	116
DL-2-Aminoadipic acid	Alkaloids	133000	Positive	161.069	[M+H]+	162.08	98
L-Carnitine	Alkaloids	885000	Positive	161.105	[M+H]+	162.11	85.03
4-Hydroxy-2-oxoglutaric acid	Organic acids	23900	Negative	162.016	[M-H]-	161	73
Umbelliferone	Lignans and Coumarins	46000	Negative	162.032	[M-H]-	161.03	133.03
7-hydroxy-2H-1-benzopyran-2-one	Lignans and Coumarins	12600000	Positive	162.032	[M+H]+	163.04	89.04
3-Hydroxy-3-methylpentane-1,5-dioic acid	Amino acids and derivatives	405000	Negative	162.053	[M-H]-	161.05	99
1,6-anhydro-β-D-glucose	Others	22900	Negative	162.053	[M-H]-	161.05	71.01
Imidazoleacetic acid (hydrochloride)	Organic acids	59900	Positive	162.57	[M+H]+	127.05	81.04
α-Hydroxycinnamic Acid	Phenolic acids	4810000	Negative	164.047	[M-H]-	163.04	119.05
p-Coumaric acid	Phenolic acids	341000	Positive	164.047	[M+H]+	165.05	119
Caffeic aldehyde	Phenolic acids	48300	Positive	164.047	[M+H]+	165.05	91.05
4-hydroxyphenyl acrylaldehyde	Others	401000	Positive	164.047	[M+H]+	165.05	119.05
1,5-Anhydro-D-glucitol	Others	40800	Negative	164.068	[M-H]-	163.2	101
4-Phenylbutyric acid	Organic acids	66600	Positive	164.084	[M+H]+	165.09	91.05
Cis-Jasmone	Others	96200	Negative	164.12	[M-H]-	163.11	148.06
Ethyl phenylacetate	Phenolic acids	384000	Positive	164.2	[M+H]+	165.09	91.05
2-(Formylamino)benzoic Acid	Phenolic acids	869000	Negative	165.043	[M-H]-	164.04	120
L-Methionine Sulfoxide	Amino acids and derivatives	256000	Positive	165.046	[M+H]+	166.05	102
6-O-methylguanine	Nucleotides and derivatives	33200	Positive	165.065	[M+H]+	166.07	124.05
L-Phenylalanine	Amino acids and derivatives	54100000	Positive	165.07	[M+H]+	166.09	120.08
6-Methylmercaptopurine	Nucleotides and derivatives	4840000	Positive	166.031	[M+H]+	167.1	121.1
D-Xylonic acid	Others	1190000	Negative	166.048	[M-H]-	165.04	75
7-Methylxanthine	Nucleotides and derivatives	527000	Positive	166.049	[M+H]+	167.06	150
3-Methylxanthine	Nucleotides and derivatives	1590000	Positive	166.049	[M+H]+	167.06	124
Paeonol	Phenolic acids	142000	Positive	166.063	[M+H]+	167.07	121
Ethylsalicylate	Phenolic acids	51800	Positive	166.063	[M+H]+	167.07	121.03
3-(4-Hydroxyphenyl)-propionic acid	Phenolic acids	80700	Negative	166.063	[M-H]-	165.06	119.05
2,6-Dimethoxybenzaldehyde	Phenolic acids	36300	Negative	166.063	[M-H]-	165.06	119.05
L-Fucitol	Others	375000	Negative	166.084	[M-H]-	165.08	59.02
1-(4-Methoxyphenyl)-1-propanol	Phenolic acids	32100	Negative	166.099	[M-H]-	165.09	149.06
Quinolinic acid	Alkaloids	61300	Negative	167.022	[M-H]-	166.02	79.96
Uric acid	Nucleotides and derivatives	27300	Negative	168.028	[M-H]-	167.02	124.01
4-MethoxySalicylic acid	Phenolic acids	1030000	Negative	168.042	[M-H]-	167.04	108.03
2',4',6'-Trihydroxyacetophenone	Phenolic acids	53600	Negative	168.042	[M-H]-	167.03	123.05
3-Hydroxymandelate	Organic acids	36900	Negative	168.042	[M-H]-	167.03	121.03
Homogentisic acid	Phenolic acids	308000	Negative	168.042	[M-H]-	167.1	123.04
Vanillic acid	Phenolic acids	58100	Negative	168.042	[M-H]-	167.03	108.02
3,4-Dihydroxybenzeneacetic acid	Phenolic acids	252000	Negative	168.042	[M-H]-	167.03	123.04
Pyridoxine	Others	564000	Positive	169.074	[M+H]+	170.08	134.1
2,4,6-Trihydroxybenzoic acid	Phenolic acids	352000	Positive	170.022	[M+H]+	171.03	81.03
Gallic acid	Phenolic acids	39300000	Negative	170.022	[M-H]-	169.01	125
9-Oxononanoic acid	Organic acids	40600	Negative	172.11	[M-H]-	171.1	99.08
N-Acetyl-L-leucine	Amino acids and derivatives	28300	Positive	173.105	[M+H]+	174.11	86
Dehydroascorbic acid	Others	22200	Negative	174.016	[M-H]-	173.01	71.03
2-Methyl-3-oxoadipic acid	Organic acids	161000	Negative	174.053	[M-H]-	173.05	93.03
2-Oxoheptanedionic acid	Organic acids	128000	Negative	174.053	[M-H]-	173.05	93.03
Shikimic acid	Organic acids	236000	Negative	174.053	[M-H]-	173.05	93
N-Alpha-Acetyl-L-Asparagine	Amino acids and derivatives	42200	Negative	174.064	[M-H]-	173.06	58.03
Suberic Acid	Organic acids	77200	Negative	174.089	[M-H]-	173.08	111
L-Theanine	Amino acids and derivatives	50500000	Positive	174.1	[M+H]+	175.11	84
L-Arginine	Amino acids and derivatives	29700	Positive	174.112	[M+H]+	175.12	116
L-Citrulline	Amino acids and derivatives	238000	Positive	175.096	[M+H]+	176.1	113
Erythorbic Acid; Isoascorbic Acid	Others	69500	Negative	176.032	[M-H]-	175.02	59.01
2-Isopropylmalic Acid*	Organic acids	1600000	Negative	176.068	[M-H]-	175.06	115
2-Propylmalic Acid*	Organic acids	1790000	Negative	176.068	[M-H]-	175.06	115.04
N-Hydroxytryptamine	Alkaloids	294000	Positive	176.095	[M+H]+	177.1	160.3
Serotonin	Alkaloids	798000	Positive	176.095	[M+H]+	177.1	160
Esculetin	Lignans and Coumarins	291000	Negative	178.027	[M-H]-	177.02	133.2
L-Gulono-1,4-Lactone	Others	58100	Negative	178.048	[M-H]-	177.04	59
p-Coumaric acid methyl ester	Phenolic acids	253000	Positive	178.063	[M+H]+	179.07	147.1
Trans-4-Hydroxycinnamic acid Methyl Ester	Phenolic acids	368000	Negative	178.063	[M-H]-	177	145
3,4-Methylenedioxy cinnamyl alcohol	Lignans and Coumarins	686000	Negative	178.063	[M-H]-	177.06	117.04
D-Glucosamine	Others	2910000	Positive	179.079	[M+H]+	180.09	163.06
Caffeic acid	Phenolic acids	13400000	Negative	180.042	[M-H]-	179.03	135.05
D-Glucose*	Others	649000	Negative	180.063	[M-H]-	179.06	59.01
D-Fructose*	Others	703000	Negative	180.063	[M-H]-	179.06	59.01
D-Galactose*	Others	485000	Negative	180.063	[M-H]-	179.06	59
D-Mannose*	Others	781000	Negative	180.063	[M-H]-	179.06	59
Inositol*	Others	705000	Negative	180.063	[M-H]-	179.06	87
Theobromine	Alkaloids	21800000	Positive	180.065	[M+H]+	181.07	138.07
Theophylline	Alkaloids	21300	Negative	180.065	[M-H]-	179.06	164
1,7-Dimethylxanthine	Nucleotides and derivatives	46900	Positive	180.065	[M+H]+	181.07	124
Propylparaben	Phenolic acids	20300	Negative	180.079	[M-H]-	179.07	92.03
4-Hydroxy-5-(2-oxo-1-pyrrolidinyl)benzoic acid	Alkaloids	1220000	Positive	181.074	[M+H]+	182.08	136.08
L-Tyrosine	Amino acids and derivatives	2230000	Positive	181.074	[M+H]+	182.08	136.1
Methyl 2,4-dihydroxyphenylacetate	Phenolic acids	132000	Negative	182.058	[M-H]-	181.05	135.04
Syringaldehyde; 4-Hydroxy-3,5-Dimethoxybenzaldehyde	Phenolic acids	63400	Negative	182.058	[M-H]-	181.05	151
D-Sorbitol*	Others	261000	Negative	182.079	[M-H]-	181.07	71
Dulcitol*	Others	375000	Negative	182.079	[M-H]-	181.07	101
Allitol	Others	469000	Negative	182.079	[M-H]-	181.07	59.01
D-Mannitol*	Others	98900	Negative	182.079	[M-H]-	181.07	101.02
2,3,5-trimethoxytoluene	Others	35900	Positive	182.094	[M+H]+	183.1	137.06
4-Pyridoxic acid	Others	105000	Positive	183.053	[M+H]+	184.06	148
Chelidonic acid	Organic acids	189000	Negative	184.001	[M-H]-	183	67.02
Methyl gallate	Phenolic acids	24300000	Negative	184.037	[M-H]-	183.03	124.02
4-O-Methylgallic Acid	Phenolic acids	24700000	Negative	184.037	[M-H]-	183.03	124.02
3-O-Methylgallic acid	Phenolic acids	360000	Negative	184.037	[M-H]-	183.03	124.02
O-Phosphocholine	Alkaloids	158000	Positive	184.073	[M]+	184	125
(E)-Linalool-1-oic acid	Lipids	25800000	Negative	184.11	[M-H]-	183.03	124.02
4-Hydroxy-3,5-dimethoxybenzyl alcohol	Phenolic acids	24800	Negative	184.19	[M-H]-	183.06	153.02
3-Phospho-D-glyceric acid	Others	48500	Negative	185.993	[M-H]-	184.98	78.96
Undecylic Acid	Lipids	1160000	Negative	186.162	[M-H]-	185.15	185.16
3-Indoleacrylic acid	Alkaloids	3070000	Positive	187.063	[M+H]+	188.07	118.07
3-amino-2-naphthoic acid	Alkaloids	6890000	Positive	187.063	[M+H]+	188.07	118.06
Ayapin	Lignans and Coumarins	536000	Negative	188.041	[M-H]-	187.1	123.1
N-Acetyl-L-Glutamine	Amino acids and derivatives	285000	Negative	188.08	[M-H]-	187.07	125
Azelaic acid	Organic acids	9950000	Negative	188.105	[M-H]-	187.1	125
Eucommiol	Others	766000	Negative	188.105	[M-H]-	187.1	169.09
N6-Acetyl-L-lysine	Amino acids and derivatives	118000	Positive	188.116	[M+H]+	189.12	126
N-Glycyl-L-leucine	Amino acids and derivatives	43300	Positive	188.116	[M+H]+	189.12	86
Arginine methyl ester	Amino acids and derivatives	31900	Positive	188.127	[M+H]+	189.14	70.07
N-Monomethyl-L-arginine	Amino acids and derivatives	39700	Positive	188.127	[M+H]+	189.13	70.07
Trimethyllysine	Amino acids and derivatives	140000	Positive	188.152	[M+H]+	189.16	84.08
N-Acetyl-L-glutamic acid	Amino acids and derivatives	185000	Negative	189.064	[M-H]-	188.06	128
2,6-Diaminooimelic acid	Organic acids	150000	Positive	190.095	[M+H]+	191.1	128
Citric Acid*	Organic acids	55800000	Negative	192.027	[M-H]-	191.02	111.01
Isocitric Acid*	Organic acids	3880000	Negative	192.027	[M-H]-	191.02	111.01
Noreugenin; 5,7-Dihydroxy-2-Methylchromone	Phenolic acids	25100	Positive	192.042	[M+H]+	193.05	153.02
Scopoletin (7-Hydroxy-6-methoxycoumarin)	Lignans and Coumarins	33000	Positive	192.042	[M+H]+	193.05	133.03
Isoscopoletin (6-Hydroxy-7-Methoxycoumarin)	Lignans and Coumarins	80500	Positive	192.042	[M+H]+	193.05	178.02
isoscopoletin	Lignans and Coumarins	20700	Positive	192.042	[M+H]+	193.05	133.03
Quinic Acid	Organic acids	9030000	Negative	192.063	[M-H]-	191.06	85
Senkyunolide A	Others	136000	Positive	192.115	[M+H]+	193.12	105.1
Ferulic acid	Phenolic acids	607000	Negative	194.058	[M-H]-	193.05	134.01
Caffeine	Alkaloids	20700000	Positive	194.08	[M+H]+	195.09	83.06
Cyclo(Pro-Pro)	Amino acids and derivatives	28100	Positive	194.106	[M+H]+	195.11	70.06
Vanillin acetate	Phenolic acids	113000	Positive	194.19	[M+H]+	195.06	93.03
Gluconic acid	Others	609000	Negative	196.058	[M-H]-	195.05	74.9
Cyclo(D-Val-L-Pro)	Amino acids and derivatives	19700	Positive	196.3	[M+H]+	197.13	70.07
syringic acid	Phenolic acids	170000	Negative	198.053	[M-H]-	197.05	123
Danshensu	Phenolic acids	602000	Negative	198.053	[M-H]-	197.05	135
4-Hydroxy-3-methoxymandelate	Phenolic acids	23000	Negative	198.053	[M-H]-	197	153
D-Erythrose-4-phosphate	Others	22100	Negative	200.009	[M-H]-	199	78.96
Dodecanoic acid (Lauric acid)	Lipids	349000	Negative	200.178	[M-H]-	199.17	199.17
Spermine	Alkaloids	9360000	Positive	202.216	[M+H]+	203.22	83
Senkyunolide C	Phenolic acids	4590000	Positive	204.079	[M+H]+	205.09	149.02
Senkyunolide B	Others	4890000	Positive	204.079	[M+H]+	205.09	149.02
1-Methoxy-indole-3-acetamide	Alkaloids	6260000	Positive	204.09	[M+H]+	205.1	146.06
L-Tryptophan	Amino acids and derivatives	2070000	Negative	204.09	[M-H]-	203.08	116.05
4,8-Dihydroxyquinoline-2-carboxylic acid	Organic acids	38500	Negative	205.038	[M-H]-	204.03	160.04
Methoxyindoleacetic acid	Alkaloids	59200	Positive	205.074	[M+H]+	206.1	147.5
Clove chromone	Others	71700	Positive	206.058	[M+H]+	207.07	121.1
Pherocon (4-(4-Acetoxyphenyl)-2-butanone)	Others	44400	Positive	206.094	[M+H]+	207.1	107.05
2,4-Di-Tert-Butylphenol	Phenolic acids	135000	Negative	206.167	[M-H]-	205.16	189.13
N,N'-dicyclohexylcarbodiimide	Others	143000	Negative	206.178	[M-H]-	205.17	189.13
N-Acetyl-L-phenylalanine	Amino acids and derivatives	297000	Negative	207.09	[M-H]-	206.08	58.03
N-Acetyl-DL-phenylalanine	Amino acids and derivatives	61000	Positive	207.226	[M+H]+	208.1	120.08
3-[(1-Carboxyvinyl)oxy]benzoic Acid	Phenolic acids	51200	Negative	208.037	[M-H]-	207.03	119.05
Sinapinaldehyde	Phenolic acids	268000	Negative	208.074	[M-H]-	207.07	192
Ethyl caffeate	Phenolic acids	59100	Negative	208.074	[M-H]-	207.07	135.1
Ferulic acid methyl ester	Phenolic acids	32400	Negative	208.21	[M-H]-	207.07	133.03
D-Galactaric acid	Others	102000	Negative	210.038	[M-H]-	209.03	85.03
D-Saccharic acid	Others	184000	Negative	210.038	[M-H]-	209.03	85.03
Sedoheptulose	Others	157000	Negative	210.073	[M-H]-	209.07	59.01
1-Acetyl-β-carboline	Alkaloids	32000	Positive	210.079	[M+H]+	211.09	193.07
Dihydrojasmonic acid	Organic acids	97800	Negative	212.141	[M-H]-	211.1	167
δ-Tridecalactone	Lipids	20200	Positive	212.178	[M+H]+	213.3	81
Methyl syringate	Phenolic acids	26600	Negative	212.2	[M-H]-	211.06	181.01
2-Deoxyribose-1-phosphate	Nucleotides and derivatives	348000	Negative	214.024	[M-H]-	213.1	97
Undecanedioic acid	Lipids	823000	Negative	216.136	[M-H]-	215.13	153.13
D-Pantothenic Acid	Others	142000	Positive	219.111	[M+H]+	220.12	202.1
N-Acetyl-D-glucosamine*	Others	1190000	Positive	221.09	[M+H]+	222	144
N-Acetyl-D-galactosamine*	Others	380000	Positive	221.09	[M+H]+	222.1	84.05
L-Glycyl-L-phenylalanine	Amino acids and derivatives	129000	Positive	222.1	[M+H]+	223.11	120.09
N-Acetyl-L-tyrosine	Amino acids and derivatives	51500	Positive	223.084	[M+H]+	224.09	136
Sinapic acid	Phenolic acids	55300	Negative	224.068	[M-H]-	223.06	193
Methyl jasmonate	Organic acids	86300	Positive	224.141	[M+H]+	225.15	151.11
2'-Deoxycytidine	Nucleotides and derivatives	54400	Positive	227.091	[M+H]+	228.1	112
2-Dodecenedioic acid	Lipids	504000	Negative	228.136	[M-H]-	227.13	183.14
Myristic Acid	Lipids	24900000	Negative	228.209	[M-H]-	227.2	227.2
L-Valyl-L-Leucine	Amino acids and derivatives	104000	Positive	231.17	[M+H]+	231.16	72.08
L-Lysine-Butanoic Acid	Amino acids and derivatives	41000	Positive	234.158	[M+H]+	235.1	118.3
L-Alanyl-L-Phenylalanine	Amino acids and derivatives	30800	Positive	236.116	[M+H]+	237.12	120.09
Chrysophanol-9-anthrone	Quinones	1650000	Negative	240.079	[M-H]-	239.07	223.03
Cis-10-Pentadecenoic Acid(C15: 1)	Lipids	1600000	Negative	240.209	[M-H]-	239.2	223.03
Palmitaldehyde	Lipids	59500000	Negative	240.245	[M-H]-	239	223
Thymidine	Nucleotides and derivatives	111000	Positive	242.09	[M+H]+	243.1	127
13-methylmyristic acid	Lipids	22700	Negative	242.225	[M-H]-	241.22	241.21
Pentadecanoic Acid	Lipids	64100	Negative	242.225	[M-H]-	241.22	241.22
Cytidine	Nucleotides and derivatives	1680000	Positive	243.086	[M+H]+	244.09	112
Cytarabine	Nucleotides and derivatives	882000	Positive	243.086	[M+H]+	244.09	112.05
1-beta-D-Arabinofuranosyluracil	Nucleotides and derivatives	252000	Positive	244.07	[M+H]+	245.07	113.03
Uridine	Nucleotides and derivatives	398000	Negative	244.07	[M-H]-	243.06	110
Tridecanedioic acid	Lipids	98100	Negative	244.167	[M-H]-	243.16	181.16
L-Leucyl-L-Leucine	Amino acids and derivatives	70700	Positive	245.186	[M+H]+	245.18	86.1
isopimpinellin	Lignans and Coumarins	20500	Positive	246.053	[M+H]+	247.06	217.01
N-Acetyl-L-Tryptophan	Amino acids and derivatives	1420000	Negative	246.1	[M-H]-	245.09	203.2
2'-Deoxyadenosine	Nucleotides and derivatives	397000	Positive	251.102	[M+H]+	252.11	136
2'-Deoxyinosine	Nucleotides and derivatives	43500	Positive	252.086	[M+H]+	253.09	137
3,4'-Dihydroxyflavone	Flavonoids	39800	Positive	254.058	[M+H]+	255.07	181.06
7,8-Dihydroxy-4-phenylcoumarin	Lignans and Coumarins	35200	Positive	254.24	[M+H]+	255.07	181.07
2,4,4'-trihydroxychalcone	Flavonoids	182000	Positive	256.074	[M+H]+	257.08	137.02
3,9-Dihydroxypterocarpan	Flavonoids	249000	Negative	256.074	[M-H]-	255.07	119.05
Pinocembrin (Dihydrochrysin)	Flavonoids	51700	Negative	256.074	[M-H]-	255.07	151
Aloe-Emodin-9-Anthrone	Quinones	55300	Negative	256.074	[M-H]-	255.07	213.06
Isoliquiritigenin	Flavonoids	189000	Positive	256.074	[M+H]+	257.08	137.02
Nicotinate D-ribonucleoside	Others	451000	Positive	256.082	[M+H]+	256.2	124.1
1,14-Tetradecanedioic Acid	Lipids	83500	Negative	258.183	[M-H]-	257.18	195.18
D-Fructose 6-phosphate*	Others	185000	Negative	260.03	[M-H]-	259	97
Glucose-1-phosphate*	Others	216000	Negative	260.03	[M-H]-	259.02	97
D-Glucose 6-phosphate*	Others	172000	Negative	260.03	[M-H]-	259.02	97
L-γ-Glutamyl-L-leucine	Amino acids and derivatives	85200	Positive	260.137	[M+H]+	261.14	86.1
Abscisic acid	Organic acids	270000	Negative	264.136	[M-H]-	263.13	204.12
N-Feruloylputrescine	Alkaloids	211000	Positive	264.147	[M+H]+	265.15	177.06
Thiamine (Vitamin B1)	Others	24500	Positive	265.112	[M+H]+	265.1	122.1
Caffeoylcholine	Alkaloids	171000	Positive	266.124	[M]+	266.13	207.06
2'-Deoxyguanosine	Nucleotides and derivatives	260000	Positive	267.097	[M+H]+	268.1	152
Adenosine	Nucleotides and derivatives	69100000	Positive	267.097	[M+H]+	268.1	136.06
Vidarabine	Others	68700000	Positive	267.097	[M+H]+	268.11	136.06
Caaverine	Alkaloids	25900000	Positive	267.126	[M+H]+	268.13	191.1
asimilobine	Alkaloids	110000	Positive	267.126	[M+H]+	268.13	191.09
cinnamoyltyramine	Alkaloids	99000	Positive	267.126	[M+H]+	268.13	121
Tectochrysin	Flavonoids	51000	Positive	268.074	[M+H]+	269.08	226
Inosine	Nucleotides and derivatives	44800	Positive	268.081	[M+H]+	269.09	137
9-(Arabinosyl)hypoxanthine	Nucleotides and derivatives	156000	Negative	268.081	[M-H]-	267.07	135
10-Heptadecenoic Acid	Lipids	394000	Negative	268.24	[M-H]-	267.23	267.23
2,5-Dimethylchromone-7-O-sulfate	Others	19800	Negative	270.02	[M-H]-	269.01	189.06
Apigenin; 4',5,7-Trihydroxyflavone	Flavonoids	1770000	Positive	270.053	[M+H]+	271.06	153.01
Emodin	Quinones	239000	Negative	270.053	[M-H]-	269.05	225
Galangin (3,5,7-Trihydroxyflavone)	Flavonoids	4650000	Negative	270.053	[M-H]-	269.05	151
3',4',7-Trihydroxyflavone	Flavonoids	120000	Positive	270.053	[M+H]+	271.06	243.06
Genistein	Flavonoids	11100000	Positive	270.053	[M+H]+	271.06	153.02
isoemodin	Quinones	248000	Negative	270.053	[M-H]-	269.05	225
Butin	Flavonoids	1820000	Positive	272.068	[M+H]+	273.08	153
Naringenin chalcone	Flavonoids	37100	Positive	272.068	[M+H]+	273.08	153
Garbanzol	Flavonoids	27100	Negative	272.068	[M-H]-	271.06	242.7
Naringenin (5,7,4'-Trihydroxyflavanone)	Flavonoids	27800	Negative	272.068	[M-H]-	271.06	151
Arbutin	Phenolic acids	146000	Negative	272.09	[M-H]-	271.08	108.02
p-Hydroxypheny-β-D-allopyranoside	Phenolic acids	105000	Negative	272.09	[M-H]-	271.08	108.02
2-Hydroxyhexadecanoic acid	Organic acids	1980000	Negative	272.235	[M-H]-	271.23	225.22
Hexadecylsphingosine	Lipids	2300000	Positive	273.267	[M+H]+	274.27	256.27
Epiafzelechin	Flavonoids	404000	Positive	274.084	[M+H]+	275.09	107
Phloretin	Flavonoids	209000	Negative	274.084	[M-H]-	273.08	167.03
Afzelechin (3,5,7,4'-Tetrahydroxyflavan)	Flavonoids	29400	Positive	274.084	[M+H]+	275.09	139
Apiferol	Flavonoids	140000	Positive	274.084	[M+H]+	275.09	139.04
9,12-Octadecadien-6-Ynoic Acid	Lipids	156000	Positive	276.209	[M+H]+	277.2	93
Senkyunolide M	Others	9520000	Positive	278.152	[M+H]+	279.16	121
α-Linolenic Acid	Lipids	127000000	Negative	278.225	[M-H]-	277.22	277.22
γ-Linolenic Acid	Lipids	268000	Negative	278.225	[M-H]-	277.22	59.01
Octadeca-11E,13E,15Z-trienoic acid	Lipids	23800000	Positive	278.225	[M+H]+	279.2	149.4
Crepenynic acid	Lipids	267000	Negative	278.225	[M-H]-	277.22	59.01
Punicic acid (9Z,11E,13Z-octadecatrienoic acid)	Lipids	31300000	Positive	278.225	[M+H]+	279.23	95.1
Roemerine	Alkaloids	47600000	Positive	279.126	[M+H]+	280.13	249.08
p-Coumaroylmalic acid	Phenolic acids	267000	Negative	280.058	[M-H]-	279.05	163.04
Linoleic acid	Lipids	10100000	Negative	280.24	[M-H]-	279.23	279.23
2'-O-Methyladenosine	Nucleotides and derivatives	1060000	Positive	281.112	[M+H]+	282.12	136.06
N6-methyladenosine	Nucleotides and derivatives	147000	Positive	281.112	[M+H]+	282.12	150.08
N-Nornuciferine	Alkaloids	115000000	Positive	281.141	[M+H]+	282.14	265.12
O-Nornuciferine (N-Methylasimilobine)(Floribundine)	Alkaloids	15800000	Positive	281.142	[M+H]+	282.15	236.2
Nornuciferine	Alkaloids	124000000	Positive	281.142	[M+H]+	282.15	265.1
7,4'-Di-O-methyldaidzein	Flavonoids	86000	Positive	282.089	[M+H]+	283.1	268.07
Petroselinic acid	Lipids	1510000	Negative	282.256	[M-H]-	281.25	281.25
Elaidic Acid	Lipids	4900000	Negative	282.256	[M-H]-	281.25	281.25
Guanosine	Nucleotides and derivatives	13400000	Positive	283.092	[M+H]+	284.1	152
4-Hydroxycinnamic acid p-hydroxyphenethylamine	Phenolic acids	941000	Positive	283.12	[M+H]+	284.13	147.04
cis-N-p-Coumaroyltyramine	Alkaloids	162000	Positive	283.121	[M+H]+	284.13	147.04
p-Coumaroyltyramine	Alkaloids	365000	Positive	283.121	[M+H]+	284.12	147.04
Glycitein	Flavonoids	168000	Negative	284.068	[M-H]-	283.06	268
Prunetin (5,4'-Dihydroxy-7-methoxyisoflavone)	Flavonoids	82700000	Negative	284.068	[M-H]-	283.06	268
Izalpinin	Flavonoids	8560000	Positive	284.068	[M+H]+	285.08	242.06
Acacetin	Flavonoids	33200000	Positive	284.068	[M+H]+	285.08	270
Wogonin (5,7-Dihydroxy-8-methoxyflavone)	Flavonoids	22100000	Positive	284.068	[M+H]+	285.08	270.07
3'-Methoxydaidzein	Flavonoids	80800	Positive	284.068	[M+H]+	285.08	229.08
6-Methylaloe emodin	Quinones	1390000	Negative	284.068	[M-H]-	283.06	240.04
Genkwanin (Apigenin 7-methyl ether)	Flavonoids	32800000	Positive	284.068	[M+H]+	285.08	270
Physcion	Quinones	207000	Negative	284.068	[M-H]-	283.06	240.04
Xanthosine	Nucleotides and derivatives	122000	Negative	284.076	[M-H]-	283.07	151
Phenethyl caffeate	Phenolic acids	238000	Negative	284.105	[M-H]-	283.1	135
N-(beta-D-Glucosyl)nicotinate	Others	37200	Positive	285.085	[M+H]+	286.09	124
L-Malic acid-2-O-gallate	Phenolic acids	51000	Negative	286.032	[M-H]-	285.03	133.02
2'-Hydroxygenistein	Flavonoids	948000	Positive	286.047	[M+H]+	287.06	153.02
Isoscutellarein	Flavonoids	953000	Positive	286.047	[M+H]+	287.06	153.01
3,5,7,2'-Tetrahydroxyflavone; Datiscetin	Flavonoids	265000	Negative	286.048	[M-H]-	285.04	257.05
Luteolin (5,7,3',4'-Tetrahydroxyflavone)	Flavonoids	890000	Positive	286.048	[M+H]+	287.06	153.02
Scutellarein (5,6,7,4'-Tetrahydroxyflavone)	Flavonoids	60100	Positive	286.048	[M+H]+	287.06	269.04
Kaempferol (3,5,7,4'-Tetrahydroxyflavone)	Flavonoids	187000	Positive	286.048	[M+H]+	287.06	153.02
Licochalcone B	Flavonoids	22100	Positive	286.084	[M+H]+	287.09	121.03
5,4'-Dihydroxy-7-methoxyflavanone (Sakuranetin)	Flavonoids	976000	Positive	286.084	[M+H]+	287.08	167
Hexadecanedioic acid	Lipids	1220000	Negative	286.214	[M-H]-	285.21	223.21
Feruloylhistamine	Alkaloids	196000	Positive	287.127	[M+H]+	288.13	177.05
3,4,2',4',6'-Pentahydroxychalcone	Flavonoids	273000	Positive	288.063	[M+H]+	289.07	163.04
2-hydroxynaringenin	Flavonoids	599000	Negative	288.063	[M-H]-	287.06	125.03
Fustin	Flavonoids	32900	Negative	288.063	[M-H]-	287.06	149
Aromadendrin (Dihydrokaempferol)	Flavonoids	266000	Negative	288.063	[M-H]-	287.06	259
2-Hydroxy-2,3-dihydrogenistein	Flavonoids	593000	Negative	288.063	[M-H]-	287.06	125.02
Eriodictyol (5,7,3',4'-Tetrahydroxyflavanone)	Flavonoids	151000	Positive	288.063	[M+H]+	289.07	153.02
Isookanin	Flavonoids	68600	Positive	288.063	[M+H]+	289.07	153.02
Okanin	Flavonoids	378000	Positive	288.063	[M+H]+	289.07	153.02
Phloroglucinol-1-O-β-D-glucopyranoside	Phenolic acids	25100	Negative	288.085	[M-H]-	287.08	125.02
9,16-Dihydroxypalmitic acid	Lipids	15100000	Negative	288.23	[M-H]-	287.22	287.22
10,16-Dihydroxypalmitic acid	Lipids	370000	Negative	288.23	[M-H]-	287.22	241.22
Glucarate O-Phosphoric acid	Others	1150000	Negative	290.004	[M-H]-	289	97
4-(3,4,5-Trihydroxybenzoxy)benzoic Acid	Phenolic acids	2520000	Negative	290.043	[M-H]-	289.04	137.02
Epicatechin*	Flavonoids	15400000	Positive	290.079	[M+H]+	291.09	139.04
3',4,4',5,7-Pentahydroxyflavan (Luteoforol)	Flavonoids	81400	Positive	290.079	[M+H]+	291.09	139.04
Catechin*	Flavonoids	4610000	Positive	290.079	[M+H]+	291.09	139.04
Argininosuccinic acid	Organic acids	49900	Negative	290.123	[M-H]-	289.1	97.1
4-Oxo-9Z,11Z,13E,15E-Octadecatetraenoic Acid	Lipids	28000	Positive	290.188	[M+H]+	291	190.9
Brevifolin carboxylic acid	Phenolic acids	15200000	Negative	292.022	[M-H]-	291.01	247
12-Oxo-phytodienoic acid	Lipids	494000	Negative	292.204	[M-H]-	291.2	235.17
Methyl linolenate	Lipids	7990000	Positive	292.24	[M+H]+	293.25	95.09
Dehydronuciferine	Alkaloids	332000	Positive	293.142	[M+H]+	294.15	263.13
17-Hydroxylinolenic acid	Lipids	6390000	Negative	294.219	[M-H]-	293.21	113.1
Machilusolide D	Others	5980000	Negative	294.219	[M-H]-	293.21	293.21
13S-Hydroxy-9Z,11E,15Z-octadecatrienoic acid	Lipids	8660000	Negative	294.219	[M-H]-	293.21	195.14
2R-hydroxy-9Z,12Z,15Z-octadecatrienoic acid	Lipids	908000	Negative	294.219	[M-H]-	293.21	185.12
13-KODE; (9Z,11E)-13-Oxooctadeca-9,11-dienoic acid	Lipids	282000	Negative	294.219	[M-H]-	293.21	235.17
9-Hydroxy-10,12,15-octadecatrienoic acid	Lipids	294000	Negative	294.219	[M-H]-	293.21	235.17
9-Oxo-10E,12Z-octadecadienoic acid	Lipids	436000	Negative	294.219	[M-H]-	293.21	275.1
5-Aminoimidazole ribonucleotide	Nucleotides and derivatives	496000	Positive	295.056	[M+H]+	296.07	104.11
Cis-Coutaric acid	Phenolic acids	496000	Negative	296.053	[M-H]-	295.05	163.04
15(R)-Hydroxylinoleic Acid	Lipids	731000	Positive	296.234	[M+H]+	297.24	81.07
9-Oxo-12Z-Octadecenoic acid	Lipids	981000	Positive	296.234	[M+H]+	297.24	81.07
12,13-Epoxy-9-Octadecenoic Acid	Lipids	172000	Negative	296.235	[M-H]-	295.23	195.2
13(S)-HODE;13(S)-Hydroxyoctadeca-9Z,11E-dienoic acid	Lipids	15300000	Negative	296.235	[M-H]-	295.23	195.14
9S-Hydroxy-10E,12Z-octadecadienoic acid	Lipids	16000000	Negative	296.235	[M-H]-	295.23	195.14
9(10)-EpOME;(9R,10S)-(12Z)-9,10-Epoxyoctadecenoic acid	Lipids	460000	Negative	296.235	[M-H]-	295.23	171.1
Phytol	Lipids	1860000	Positive	296.308	[M+H]+	297.32	251.14
5'-Deoxy-5'-(methylthio)adenosine	Nucleotides and derivatives	101000	Positive	297.09	[M+H]+	298.1	136
N7-Methylguanosine	Nucleotides and derivatives	22700	Positive	297.107	[M+H]+	298.1	166.3
Apigenin-7,4'-dimethyl ether	Flavonoids	4800000	Positive	298.084	[M+H]+	299.09	284.1
Ricinoleic acid	Lipids	253000	Negative	298.251	[M-H]-	297.24	183.14
1-Eicosanol	Lipids	286000	Negative	298.324	[M-H]-	297.32	183.1
6-Hydroxyrhein	Quinones	47100	Negative	300.028	[M-H]-	299.02	255.03
Xanthorin	Quinones	785000	Negative	300.063	[M-H]-	299.05	284.03
Gnetifolin B	Flavonoids	18200000	Negative	300.063	[M-H]-	299.06	284.03
6-Demethoxy-7-methylcapillarisin	Others	34300	Positive	300.063	[M+H]+	301.07	286.05
Rhamnocitrin (7-Methylkaempferol)	Flavonoids	20100000	Positive	300.063	[M+H]+	301.07	286.05
Diosmetin (5,7,3'-Trihydroxy-4'-methoxyflavone)	Flavonoids	19900000	Positive	300.063	[M+H]+	301.07	286.05
Chrysoeriol	Flavonoids	18700000	Positive	300.063	[M+H]+	301.07	286.08
5,7,2'-Trhiyroxy-8-methoxyflavone	Flavonoids	18400000	Negative	300.063	[M-H]-	299.06	284.04
6-methyl luteolin	Flavonoids	141000	Positive	300.063	[M+H]+	301.07	167.03
Cajanin	Flavonoids	1190000	Positive	300.063	[M+H]+	301.07	258.05
Hispidulin (5,7,4'-Trihydroxy-6-methoxyflavone)	Flavonoids	20600000	Positive	300.063	[M+H]+	301.07	286.05
1-O-Salicyloyl-β-D-glucose	Phenolic acids	4630000	Negative	300.084	[M-H]-	299.08	137.02
4-O-Glucosyl-4-hydroxybenzoic acid	Phenolic acids	44800	Negative	300.084	[M-H]-	299.08	137.02
Glucosyloxybenzoic acid	Phenolic acids	4460000	Negative	300.085	[M-H]-	299.08	137.02
4'-Hydroxy-5,7-dimethoxyflavanone	Flavonoids	15700000	Negative	300.1	[M-H]-	299.1	223.1
Salidroside	Phenolic acids	5390000	Negative	300.121	[M-H]-	299.11	137.02
12-Hydroxyoctadecanoic acid	Lipids	22100	Negative	300.266	[M-H]-	299.26	253.25
3-Hydroxyoctadecanoic Acid	Lipids	113000	Negative	300.267	[M-H]-	299.26	299.26
ellagicacid	Phenolic acids	4080000	Negative	302.006	[M-H]-	301	301
3,5,7,4'-Tetrahydroxy-Coumaronochromone	Others	260000	Positive	302.042	[M+H]+	303.04	257.04
Morin	Flavonoids	571000	Positive	302.043	[M+H]+	303.05	229.05
6-HydroxyLuteolin	Flavonoids	150000	Negative	302.043	[M-H]-	301.04	255.02
Tricetin (5,7,3',4',5'-Pentahydroxyflavone)	Flavonoids	328000	Negative	302.043	[M-H]-	301.04	151
Hypolaetin	Flavonoids	549000	Negative	302.043	[M-H]-	301.04	149.02
Robinetin	Flavonoids	117000	Positive	302.043	[M+H]+	303.05	257.05
Quercetin	Flavonoids	594000	Positive	302.043	[M+H]+	303.05	229.05
Dihydrokaempferide	Flavonoids	237000	Positive	302.079	[M+H]+	303.09	229.08
Hesperetin	Flavonoids	1370000	Negative	302.079	[M-H]-	301.07	164
Homoeriodictyol	Flavonoids	2180000	Positive	302.079	[M+H]+	303.09	153.02
Tachioside	Phenolic acids	284000	Negative	302.1	[M-H]-	301.09	123.01
3-methoxy-5-hydroxy-1-O-β-D-glucopyranoside	Phenolic acids	171000	Negative	302.1	[M-H]-	301.09	139.04
Salirepin	Phenolic acids	173000	Negative	302.1	[M-H]-	301.09	139.04
Taxifolin(Dihydroquercetin)	Flavonoids	2560000	Positive	304.058	[M+H]+	305.06	231.06
5,7,3',4',5'-Pentahydroxydihydroflavone	Flavonoids	19700000	Negative	304.059	[M-H]-	303.05	151.03
Capsaicin	Alkaloids	35800	Positive	305.199	[M+H]+	306.21	137
Methyl Brevifolincarboxylate	Phenolic acids	49000	Negative	306.038	[M-H]-	305.03	273
Gallocatechin*	Flavonoids	13700000	Positive	306.074	[M+H]+	307.08	139.04
Epigallocatechin*	Flavonoids	37300000	Positive	306.074	[M+H]+	307.08	139.04
N-Feruloylagmatine	Alkaloids	783000	Positive	306.169	[M+H]+	307.18	177.05
L-Glutamine-O-glycoside	Amino acids and derivatives	93700	Negative	308.122	[M-H]-	307	145
L-Glutamic acid-O-glycoside	Amino acids and derivatives	108000	Negative	309.106	[M-H]-	308.1	146.1
Feruloylmalic acid	Phenolic acids	121000	Negative	310.069	[M-H]-	309.06	193.05
9-Hydroperoxy-10E,12,15Z-octadecatrienoic acid	Lipids	678000	Negative	310.1	[M-H]-	309.21	209.1
γ-Glutamyltyrosine	Amino acids and derivatives	41200	Positive	310.116	[M+H]+	311.12	165.05
9-Hydroxy-12-oxo-10(E),15(Z)-octadecadienoic acid	Lipids	178000	Negative	310.214	[M-H]-	309.21	171.1
13(s)-hydroperoxy-(9z,11e,15z)-octadecatrienoic acid	Lipids	80100	Negative	310.214	[M-H]-	309.2	227.2
Eicosenoic acid	Lipids	49500	Negative	310.287	[M-H]-	309.28	309.28
2-(Dimethylamino)guanosine	Nucleotides and derivatives	557000	Positive	311.123	[M+H]+	312.13	180
N6-(2-Hydroxyethyl)adenosine	Nucleotides and derivatives	349000	Positive	311.123	[M+H]+	312.13	180.09
Lirinine	Alkaloids	351000	Positive	311.152	[M+H]+	312.15	281.11
2-Caffeoyl-L-tartaric acid (Caftaric acid)	Phenolic acids	114000	Negative	312.048	[M-H]-	311.04	179.04
1-O-Caffeoyl xylose	Phenolic acids	48900	Negative	312.085	[M-H]-	311.08	163.04
13-Hydroperoxy-9Z,11E-octadecadienoic acid	Lipids	853000	Negative	312.23	[M-H]-	311.22	249.22
9-Hydroperoxy-9Z,11E-Octadecadienoic Acid	Lipids	388000	Negative	312.23	[M-H]-	311.22	293.21
13S-Hydroperoxy-9Z,11E-octadecadienoic acid	Lipids	357000	Negative	312.23	[M-H]-	311.1	171.3
9-Hydroxy-12-oxo-15(Z)-octadecenoic acid	Lipids	4950000	Negative	312.23	[M-H]-	311.22	223.17
5S,8R-DiHODE; (5S,8R,9Z,12Z)-5,8-Dihydroxyoctadeca-9,12-dienoate	Lipids	5040000	Negative	312.23	[M-H]-	311.22	223.17
9-Hydroxy-13-oxo-10-octadecenoic Acid	Lipids	408000	Negative	312.23	[M-H]-	311.22	293.21
7S,8S-DiHODE; (9Z,12Z)-(7S,8S)-Dihydroxyoctadeca-9,12-dienoic acid	Lipids	847000	Negative	312.23	[M-H]-	311.22	249.22
N-Feruloyltyramine	Alkaloids	1610000	Positive	313.131	[M+H]+	314.14	177.05
4',5-Dihydroxy-3',5'-dimethoxyflavone	Flavonoids	215000	Positive	314.079	[M+H]+	315.09	272.07
Velutin (5,4'-dihydroxy-7,3'-dimethoxyflavone)	Flavonoids	3220000	Negative	314.079	[M-H]-	313.08	298.05
3-O-Acetylpinobanksin	Flavonoids	62400	Negative	314.079	[M-H]-	313.07	253
3',4'-Dihydroxy-7,5'-dimethoxyflavone	Flavonoids	43900	Positive	314.079	[M+H]+	315.09	300.06
Kumatakenin	Flavonoids	898000	Negative	314.079	[M-H]-	313.07	283
Methyl salicylate-2-O-glucoside	Phenolic acids	61300	Negative	314.1	[M-H]-	313.09	107.05
Flavokawain A	Flavonoids	2400000	Positive	314.115	[M+H]+	315.12	181.05
12,13-DHOME; (9Z)-12,13-Dihydroxyoctadec-9-enoic acid	Lipids	478000	Negative	314.246	[M-H]-	313.24	251.24
Hydroxy ricinoleic acid	Lipids	1040000	Negative	314.246	[M-H]-	313.24	183.14
Nepetin (5,7,3',4'-Tetrahydroxy-6-methoxyflavone)	Flavonoids	93900	Positive	316.058	[M+H]+	317.07	302.04
Rhamnetin	Flavonoids	1210000	Negative	316.058	[M-H]-	315.05	165
Tamarixetin (3,3',5,7-Tetrahydroxy-4'-Methoxyflavone)	Flavonoids	46500	Positive	316.058	[M+H]+	317.07	285.04
Capillarisin	Others	133000	Positive	316.058	[M+H]+	317.07	302.04
Irilin D	Flavonoids	31800	Positive	316.058	[M+H]+	317.07	168
1-O-Gentisoyl-β-D-glucoside	Phenolic acids	1210000	Negative	316.079	[M-H]-	315.07	153
Protocatechuic acid-4-O-glucoside	Phenolic acids	1140000	Negative	316.079	[M-H]-	315.07	153.02
4',6-Dihydroxy-5,7-dimethoxyflavanone	Flavonoids	107000	Positive	316.095	[M+H]+	317.1	197.05
Persicogenin (5,3'-dihydroxy-7,4'-dimethoxyflavanone)	Flavonoids	920000	Positive	316.095	[M+H]+	317.1	167.04
3,4-dihydroxyphenylethanol-β-D-glucopyranoside	Phenolic acids	230000	Negative	316.116	[M-H]-	315.11	135.04
5-(2-Hydroxyethyl)-2-O-glucosylphenol	Phenolic acids	911000	Negative	316.116	[M-H]-	315.11	153.06
4-Hydroxysphinganine	Lipids	1350000	Positive	317.293	[M+H]+	318.3	60.1
Myricetin	Flavonoids	7140000	Positive	318.038	[M+H]+	319.04	153
Quercetagetin; 3,3',4',5,6,7-Hexahydroxyflavone	Flavonoids	102000	Positive	318.039	[M+H]+	319.05	273.04
Methyl 2-O-(4-hydroxybenzoyl)-2,4,6-trihydroxyphenylacetate	Phenolic acids	1550000	Negative	318.073	[M-H]-	317.07	165.02
Trans-5-O-(p-Coumaroyl)shikimate	Phenolic acids	118000	Positive	320.09	[M+H]+	321.1	147.3
Digallic Acid	Phenolic acids	841000	Negative	322.021	[M-H]-	321	125
Cytidine 5'-monophosphate(Cytidylic acid)	Nucleotides and derivatives	79100	Positive	323.052	[M+H]+	324.06	112
(-)-Jasmonoyl-L-Isoleucine	Amino acids and derivatives	52700	Negative	323.21	[M-H]-	322.4	129.7
Uridine 5'-monophosphate	Nucleotides and derivatives	815000	Negative	324.036	[M-H]-	323.03	211
Skimmin (7-Hydroxycoumarin-7-O-glucoside)	Lignans and Coumarins	27200000	Positive	324.085	[M+H]+	325.09	163.04
Ethyl 9-Hydroxy-10,12-octadecadienoic acid	Lipids	66900	Positive	324.266	[M+H]+	326.27	309.27
N-Oleoylethanolamine	Alkaloids	308000	Positive	325.298	[M+H]+	326.31	62.06
5-O-Galloylshikimic acid	Phenolic acids	837000	Negative	326.064	[M-H]-	325.06	169.02
5-Galloylshikimic acid	Phenolic acids	465000	Negative	326.064	[M-H]-	325.06	125
(2E)-3-[4-(β-D-glucopyranoside)-phenylacrylic]-acid	Phenolic acids	195000	Negative	326.1	[M-H]-	325.09	119.05
p-Coumaric acid-4-O-glucoside	Phenolic acids	1400000	Negative	326.1	[M-H]-	325.09	163.04
Phenylpropionic acid-O-β-D-glucopyranoside	Phenolic acids	186000	Negative	326.1	[M-H]-	325.09	119.05
1-O-p-Coumaroyl-β-D-glucose	Phenolic acids	2650000	Negative	326.1	[M-H]-	325.09	163.04
N-benzoyl-2-aminoethyl-β-D-glucopyranoside	Others	1550000	Positive	327.132	[M+H]+	328.13	310.12
6-Hydroxy-5,7,4'-trimethoxyflavone	Flavonoids	1010000	Positive	328.095	[M+H]+	329.1	268.08
Demethyl coniferin	Phenolic acids	115000	Negative	328.116	[M-H]-	327.11	165.05
Macelignan	Lignans and Coumarins	78100	Positive	328.168	[M+H]+	329.17	165.09
9,12,13-Trihydroxy-10,15-octadecadienoic acid	Lipids	1190000	Negative	328.225	[M-H]-	327.22	291.2
Cyclic 3',5'-Adenylic acid	Nucleotides and derivatives	192000	Negative	329.053	[M-H]-	328.05	134.2
2-Amino-1,3-eicosanediol	Others	571000	Positive	329.327	[M+H]+	330.34	312.33
Rehderianin I	Flavonoids	135000	Positive	330.074	[M+H]+	331.07	316.05
3,7-Di-O-methylquercetin	Flavonoids	199000	Negative	330.074	[M-H]-	329.07	314
Ombuin (4',7-Dimethoxy-3,3',5-Trihydroxyflavone)	Flavonoids	189000	Positive	330.074	[M+H]+	331.08	316.05
Quercetin-3,3'-dimethyl ether	Flavonoids	26500	Negative	330.074	[M-H]-	329.07	271.03
4',5,7-Trihydroxy-3',6-dimethoxyflavone (Jaceosidin)	Flavonoids	43400	Positive	330.074	[M+H]+	331.08	301.04
tricin (5,7,4'-Trihydroxy-3',5'-dimethoxyflavone)	Flavonoids	204000	Positive	330.074	[M+H]+	331.08	315.05
Cirsiliol (3',4',5-Trihydroxy-6,7-Dimethoxyflavone)	Flavonoids	98200	Positive	330.074	[M+H]+	331.08	298.05
Iristectorigenin A	Flavonoids	125000	Positive	330.076	[M+H]+	331.08	316.05
1-O-Vanilloyl-D-Glucose	Phenolic acids	1500000	Negative	330.095	[M-H]-	329.11	167.03
Vanillic acid-4-O-glucoside	Phenolic acids	129000	Negative	330.095	[M-H]-	329.09	209.04
5-Glucosyloxy-2-Hydroxybenzoic acid methyl ester	Phenolic acids	1400000	Negative	330.095	[M-H]-	329.09	167.04
3,4,5-Trimethoxyphenyl-1-O-Glucoside	Phenolic acids	777000	Negative	330.131	[M-H]-	329.12	167
9,10,11-Trihydroxy-12-octadecenoic acid	Lipids	313000	Negative	330.24	[M-H]-	329.23	311.23
9,10-Dihydroxy-12,13-epoxyoctadecanoic acid	Lipids	51400	Negative	330.241	[M-H]-	329.23	199.13
9,12,13-TriHOME; 9(S),12(S),13(S)-Trihydroxy-10(E)-octadecenoic acid	Lipids	412000	Negative	330.241	[M-H]-	329.23	211.14
9,10,13-Trihydroxy-11-Octadecenoic Acid	Lipids	3790000	Negative	330.241	[M-H]-	329.23	229.15
Monopalmitin	Lipids	43100	Positive	330.277	[M+H]+	331.28	313.27
2'-Deoxyadenosine-5'-monophosphate	Nucleotides and derivatives	73300	Positive	331.068	[M+H]+	332.08	136
Pyridoxine-5'-O-glucoside	Others	39500	Positive	331.127	[M+H]+	332.13	152.07
2'-Deoxyinosine-5'-monophosphate	Nucleotides and derivatives	1050000	Positive	332.052	[M+H]+	333.05	137.05
Mearnsetin	Flavonoids	317000	Positive	332.053	[M+H]+	333.06	153.02
Patuletin (Quercetagetin-6-methyl ether)	Flavonoids	23500	Negative	332.053	[M-H]-	331.04	316.02
1-O-Galloyl-β-D-glucose	Phenolic acids	623000	Positive	332.074	[M+H]+	333.08	171.03
Koaburaside	Phenolic acids	432000	Negative	332.111	[M-H]-	331.1	153.02
9,10,18-Trihydroxystearic acid	Lipids	49000	Negative	332.256	[M-H]-	331.25	157.12
1-(sn-Glycero-3-phospho)-1D-myo-inositol	Others	208000	Negative	334.067	[M-H]-	333.06	333.06
Galloyl Methyl gallate	Phenolic acids	347000	Negative	336.048	[M-H]-	335.04	124
p-Dimeric galloyl methyl ester	Phenolic acids	1130000	Negative	336.048	[M-H]-	335.04	183.03
5-O-p-Coumaroylquinic acid	Phenolic acids	8370000	Negative	338.1	[M-H]-	337.09	191.05
Esculin (6,7-DihydroxyCoumarin-6-glucoside)	Lignans and Coumarins	746000	Negative	340.079	[M-H]-	339.07	177
Esculetin-7-O-glucoside	Lignans and Coumarins	731000	Negative	340.079	[M-H]-	339.07	177.02
Daphnin	Lignans and Coumarins	651000	Negative	340.079	[M-H]-	339.07	177.02
Isocorydine	Alkaloids	427000	Positive	341.163	[M+H]+	342.17	192.11
1-O-Caffeoyl-β-D-glucose	Phenolic acids	25400	Negative	342.095	[M-H]-	341.09	161.02
Vanillic Acid-4-O-Glucuronide	Phenolic acids	318000	Negative	342.095	[M-H]-	341.09	161.02
D-Maltose*	Others	114000	Negative	342.116	[M-H]-	341.11	89.02
Isomaltulose*	Others	151000	Negative	342.116	[M-H]-	341.11	89.02
Galactinol*	Others	831000	Negative	342.116	[M-H]-	341.11	179
Melibiose*	Others	79400	Negative	342.116	[M-H]-	341.11	113
D-Trehalose*	Others	138000	Negative	342.116	[M-H]-	341.11	119
D-Sucrose*	Others	452000	Negative	342.116	[M-H]-	341.11	119.03
Lactobiose*	Others	119000	Negative	342.116	[M-H]-	341.11	89.02
Coniferin	Phenolic acids	363000	Negative	342.131	[M-H]-	341.12	179
N-Cis-Feruloyl-3'-O-methyldopamine	Alkaloids	172000	Positive	343.142	[M+H]+	344.15	177.05
7,8-Dihydroxy-5,6,4'-trimethoxyflavone	Flavonoids	49200	Positive	344.089	[M+H]+	345.1	330.07
Pachypodol (5,4'-dihydroxy-3,7,3'-trimethoxyflavone)	Flavonoids	41400	Positive	344.09	[M+H]+	345.1	330.07
5,7-Dihydroxy-3',4',5'-trimethoxyflavone	Flavonoids	669000	Positive	344.09	[M+H]+	345.1	284
Tenaxin I	Flavonoids	365000	Positive	344.09	[M+H]+	345.09	330.07
Eupatorin; 3',5-Dihydroxy-4',6,7-Trimethoxyflavone	Flavonoids	394000	Positive	344.09	[M+H]+	345.1	312.06
Penduletin (5,4'-Dihydroxy-3,6,7-trimethoxyflavone)	Flavonoids	416000	Positive	344.09	[M+H]+	345.1	312.06
Eupatilin (5,7-Dihydroxy-3',4',6-Trimethoxyflavone)	Flavonoids	375000	Positive	344.09	[M+H]+	345.1	330.07
Ayanin (3',5-Dihydroxy-3,4',7-Trimethoxyflavone)	Flavonoids	35500	Positive	344.09	[M+H]+	345.1	330.07
4-O-Glucosyl-2-hydroxy-6-methoxyacetophenone	Phenolic acids	132000	Negative	344.111	[M-H]-	343.1	171.05
Dihydrocaffeoylglucose	Phenolic acids	55200	Negative	344.111	[M-H]-	343.1	181.05
Nectandrin B	Lignans and Coumarins	58100	Negative	344.162	[M-H]-	343.16	328.13
verrucosin	Lignans and Coumarins	247000	Positive	344.162	[M+H]+	345.16	221.11
Lactitol	Others	2180000	Negative	344.31	[M-H]-	343.12	59.01
Guanosine 3',5'-cyclic monophosphate	Nucleotides and derivatives	1090000	Negative	345.047	[M-H]-	344.04	150
1-O-(3,4-Dihydroxy-5-methoxy-benzoyl)-glucoside	Phenolic acids	45400	Negative	346.09	[M-H]-	345.08	139.04
3'-Adenylic Acid	Nucleotides and derivatives	33700	Negative	347.063	[M-H]-	346.06	210.9
Adenosine 5'-monophosphate	Nucleotides and derivatives	99400	Positive	347.063	[M+H]+	348.07	136
Inosine 5'-monophosphate	Nucleotides and derivatives	41600	Positive	348.047	[M+H]+	349.05	137.3
Esculetin-6-O-quinic acid	Lignans and Coumarins	43100	Positive	352.079	[M+H]+	353.1	179
Esculetin-7-O-quinic acid	Lignans and Coumarins	314000	Negative	352.079	[M-H]-	351.1	105.1
2-α-Linolenoyl-glycerol*	Lipids	940000	Positive	352.261	[M+H]+	353.27	261.22
1-α-Linolenoyl-glycerol*	Lipids	4520000	Positive	352.261	[M+H]+	353.27	261.22
Neochlorogenic acid (5-O-Caffeoylquinic acid)	Phenolic acids	26500000	Negative	354.095	[M-H]-	353.09	191
5-O-Caffeoylquinic acid	Phenolic acids	31100000	Negative	354.095	[M-H]-	353.09	191.06
Cryptochlorogenic acid (4-O-Caffeoylquinic acid)	Phenolic acids	86900000	Negative	354.095	[M-H]-	353.09	191.05
isoscopoletin-glucoside	Lignans and Coumarins	51600000	Positive	354.095	[M+H]+	355.1	163.04
Chlorogenic acid (3-O-Caffeoylquinic acid)	Phenolic acids	123000000	Negative	354.095	[M-H]-	353.09	191.01
Xanthohumol	Flavonoids	303000	Positive	354.147	[M+H]+	355.15	179.04
2-Linoleoylglycerol*	Lipids	192000	Positive	354.277	[M+H]+	355.28	263.24
1-Linoleoylglycerol*	Lipids	568000	Positive	354.277	[M+H]+	355.28	263.24
1-O-Feruloyl-β-D-glucose	Phenolic acids	2420000	Negative	356.11	[M-H]-	355.1	193.05
Homovanilloylquinic acid	Phenolic acids	79300	Negative	356.111	[M-H]-	355.1	121.1
1-Oleoyl-Sn-Glycerol	Lipids	1240000	Positive	356.293	[M+H]+	357.3	265.4
Penduletin 4'-Methyl Ether (5-Hydroxy-3,6,7,4'-Tetramethoxyflavone)	Flavonoids	79700	Positive	358.105	[M+H]+	359.11	326.08
5-Hydroxy-6,7,3',4'-tetramethoxyflavone	Flavonoids	7890000	Positive	358.105	[M+H]+	359.11	344.08
Altisin	Flavonoids	182000	Positive	358.105	[M+H]+	359.1	344.09
Eupatorin-5-methylether (3'-hydroxy-5,6,7,4'-tetramethoxyflavone)	Flavonoids	2640000	Positive	358.105	[M+H]+	359.11	298.09
5-Hydroxy-3,7,3',4'-tetramethoxyflavone (Retusin)	Flavonoids	169000	Positive	358.105	[M+H]+	359.11	344.09
Matairesinol	Lignans and Coumarins	261000	Positive	358.142	[M+H]+	359.15	137.06
Epipinoresinol	Lignans and Coumarins	255000	Negative	358.142	[M-H]-	357.13	151.04
Dehydrodiconiferyl alcohol	Phenolic acids	248000	Positive	358.142	[M+H]+	359.15	131.05
Pinoresinol	Lignans and Coumarins	266000	Negative	358.142	[M-H]-	357.13	151.04
Myricetin-3,7,3'-trimethyl ether	Flavonoids	11100000	Negative	360.085	[M-H]-	359.08	161.02
Acerosin	Flavonoids	3220000	Negative	360.085	[M-H]-	359.08	329.03
Glucosyringic acid	Phenolic acids	181000	Negative	360.106	[M-H]-	359.1	182.1
5-Hydroxy-6,7,3',4'-tetramethoxyflavanone	Flavonoids	2300000	Positive	360.121	[M+H]+	361.13	197.06
Guanosine 5'-monophosphate	Nucleotides and derivatives	401000	Positive	363.058	[M+H]+	364.07	152.1
Scopoletin-7-O-glucuronide	Lignans and Coumarins	3250000	Positive	368.074	[M+H]+	369.16	177.06
3-O-Caffeoylquinic acid methyl ester	Phenolic acids	296000	Positive	368.111	[M+H]+	369.11	177.05
Chlorogenic acid methyl ester	Phenolic acids	2540000	Negative	368.111	[M-H]-	367.1	190.9
3-O-Feruloylquinic acid	Phenolic acids	310000	Positive	368.111	[M+H]+	369.12	177.1
(6S,9R)-Deoxysappanol	Phenolic acids	119000	Positive	370.199	[M+H]+	371.21	133.1
3-Oxo-α-ionol-β-D-glucoside	Others	30400	Positive	370.199	[M+H]+	371.21	191.14
Trihydroxycinnamoylquinic acid	Phenolic acids	38900	Negative	372.106	[M-H]-	371.1	249.06
4-Ketopinoresinol	Others	26700	Negative	372.12	[M-H]-	371.11	297.11
Tangeretin (4',5,6,7,8-Pentamethoxyflavone)	Flavonoids	91600	Positive	372.121	[M+H]+	373.13	343.09
Sinensetin (5,6,7,3',4'-Pentamethoxyflavone)	Flavonoids	20900	Positive	372.121	[M+H]+	373.13	312.1
di-O-methyltetrahydrofuriguaiacin B	Lignans and Coumarins	9850000	Positive	372.194	[M+H]+	373.2	151.08
Chrysosplenetin (Quercetagetin-3,6,7,3'-tetramethyl ether)	Flavonoids	141000	Positive	374.1	[M+H]+	375.11	314.08
Skullcapflavone II	Flavonoids	226000	Positive	374.1	[M+H]+	375.11	360.08
Feruloyl syringic acid	Phenolic acids	32500	Positive	374.1	[M+H]+	375.2	137.1
5,7-Dihydroxy-6,3',4',5'-tetramethoxyflavone (Arteanoflavone)	Flavonoids	439000	Positive	374.1	[M+H]+	375.11	345.06
5,4'-Dihydroxy-3,6,7,3'-tetramethoxyflavone	Flavonoids	390000	Positive	374.1	[M+H]+	375.11	345.06
Rosmarinic acid methyl ester	Phenolic acids	153000	Negative	374.1	[M-H]-	373.09	135.04
6,7,8,3',4'-Pentamethoxyflavanone	Flavonoids	76300	Positive	374.124	[M+H]+	375.14	221.08
Nortrachelogenin	Lignans and Coumarins	124000	Positive	374.136	[M+H]+	375.14	137.06
Casticin	Flavonoids	40900	Positive	374.341	[M+H]+	375.11	342.08
Riboflavin (Vitamin B2)	Others	657000	Positive	376.138	[M+H]+	377.15	243.09
Succinyladenosine	Nucleotides and derivatives	1140000	Positive	383.108	[M+H]+	384.12	252
4-O-Glucosyl-sinapate	Phenolic acids	61400	Negative	386.121	[M-H]-	385.11	223.06
1-O-Sinapoyl-D-glucose	Phenolic acids	174000	Negative	386.122	[M-H]-	385.11	223.06
Roseoside	Others	435000	Negative	386.194	[M-H]-	385.19	223.13
5-Hydroxy-6,7,8,3',4'-pentamethoxyflavone	Flavonoids	4080000	Positive	388.116	[M+H]+	389.12	359.08
ethyl rosmarinate	Phenolic acids	4080000	Positive	388.116	[M+H]+	389.12	359.07
5'-Glucosyloxyjasmanic acid	Phenolic acids	806000	Negative	388.174	[M-H]-	387.17	207.1
4-O-Sinapoylquinic acid	Phenolic acids	25600	Positive	398.121	[M+H]+	399	207.2
Ribosyladenosine	Nucleotides and derivatives	114000	Positive	399.139	[M+H]+	400.15	136.11
Nobiletin (5,6,7,8,3',4'-Hexamethoxyflavone)	Flavonoids	124000	Positive	402.131	[M+H]+	403.14	373.1
Benzyl-(2''-O-xylosyl)glucoside	Phenolic acids	61900	Negative	402.153	[M-H]-	401.14	269.1
Aurantiamide	Alkaloids	603000	Positive	402.194	[M+H]+	403.2	117.07
6-methoxygeniposidic acid	Others	2850000	Positive	404.132	[M+H]+	405.14	151.04
Macrophylloside	Others	169000	Positive	404.132	[M+H]+	405.14	165.06
Daidzein-7-O-glucoside(Daidzin)	Flavonoids	186000	Positive	416.111	[M+H]+	417.12	255
1,3-O-Dicaffeoylglycerol	Lipids	28600	Positive	416.111	[M+H]+	417.12	163.04
Chrysin-7-O-glucoside	Flavonoids	139000	Positive	416.111	[M+H]+	417.12	255.06
Kaempferol-3-O-arabinoside	Flavonoids	2320000	Positive	418.09	[M+H]+	419.1	287.05
Luteolin-8-C-arabinoside	Flavonoids	208000	Positive	418.09	[M+H]+	419.1	383.07
Juglanin	Flavonoids	2960000	Positive	418.09	[M+H]+	419.1	287.06
Isoliquiritin	Flavonoids	279000	Positive	418.126	[M+H]+	419.13	257.09
Pinocembrin-7-O-glucoside (Pinocembroside)	Flavonoids	159000	Positive	418.127	[M+H]+	419.13	257.08
syringaresinol	Lignans and Coumarins	25000	Negative	418.163	[M-H]-	417.16	402.1
Sucrose-6-phosphate	Others	65700	Negative	422.083	[M-H]-	421.1	241
Trehalose 6-phosphate	Others	47500	Negative	422.083	[M-H]-	421.08	241.1
LysoPE 14:0(2n isomer)	Lipids	81900	Positive	425.254	[M+H]+	426.26	285.24
Adenosine 5'-diphosphate	Nucleotides and derivatives	45900	Negative	427.029	[M-H]-	426	159
Ononin	Flavonoids	49800	Positive	430.126	[M+H]+	431.13	269.09
Apigenin-7-O-glucoside(Cosmosiin)	Flavonoids	44700000	Positive	432.106	[M+H]+	433.11	271.07
Sophoricoside	Flavonoids	40800000	Positive	432.106	[M+H]+	433.11	271.06
4',5-Dihydroxyisoflavone-7-O-galactoside	Flavonoids	40800000	Positive	432.106	[M+H]+	433.11	271.06
Oroxin A	Flavonoids	164000	Positive	432.106	[M+H]+	433.11	271.08
Kaempferol-7-O-rhamnoside	Flavonoids	828000	Negative	432.106	[M-H]-	431.1	285
Genistein-8-C-glucoside	Flavonoids	47800	Positive	432.106	[M+H]+	433.11	283.06
Apigenin-6-C-glucoside (Isovitexin)	Flavonoids	866000	Positive	432.106	[M+H]+	433.11	283.06
Aloeemodin-8-O-glucoside	Quinones	457000	Negative	432.106	[M-H]-	431.1	269
Kaempferol-3-O-rhamnoside (Afzelin)(Kaempferin)	Flavonoids	1100000	Negative	432.106	[M-H]-	431.1	285
Apigenin-5-O-glucoside	Flavonoids	48400	Positive	432.106	[M+H]+	433.11	271.01
Genistein-7-O-galactoside	Flavonoids	42000000	Positive	432.106	[M+H]+	433.11	271.06
3,5,6,7,8,3',4'-Heptamethoxyflavone	Flavonoids	74000	Positive	432.142	[M+H]+	433.15	403.11
Avicularin	Flavonoids	7630000	Positive	434.085	[M+H]+	435.09	303.06
Quercetin-3-O-xyloside (Reynoutrin)	Flavonoids	7700000	Positive	434.085	[M+H]+	435.09	303.06
Quercetin-3-O-arabinoside (Guaijaverin)	Flavonoids	1250000	Negative	434.085	[M-H]-	433.08	300.03
Butin-7-O-glucoside	Flavonoids	127000	Negative	434.121	[M-H]-	433.11	271.06
Naringenin-7-O-glucoside (Prunin)	Flavonoids	128000	Negative	434.121	[M-H]-	433.11	271
Isosalipurposide (Phlorizin Chalcone)	Flavonoids	539000	Positive	434.121	[M+H]+	435.13	273.09
Isohemiphloin	Flavonoids	304000	Negative	434.121	[M-H]-	433.11	313
Naringenin-4'-O-glucoside	Flavonoids	108000	Negative	434.121	[M-H]-	433.12	271.06
Dihydrocharcone-4'-O-glucoside	Flavonoids	2900000	Negative	436.136	[M-H]-	435.13	273.08
Phloretin-2'-O-glucoside (Phlorizin)	Flavonoids	2400000	Negative	436.137	[M-H]-	435.13	166.7
Phloretin-4'-O-glucoside (Trilobatin)	Flavonoids	315000	Negative	436.137	[M-H]-	435.13	315.09
N'-p-Coumaroylagmatine-glucoside	Alkaloids	318000	Positive	438.211	[M+H]+	439.22	277.17
LysoPE 15:0	Lipids	62000	Positive	439.27	[M+H]+	440.28	299.26
LysoPE 15:0(2n isomer)	Lipids	26400	Positive	439.27	[M+H]+	440.28	299.26
N,N'-Diferuloylputrescine	Alkaloids	23200	Positive	440.195	[M+H]+	441.2	177.05
Catechin gallate	Flavonoids	29500000	Positive	442.09	[M+H]+	443.1	139.04
Bis(p-Coumaroyl)tartaric acid	Phenolic acids	22800	Negative	442.09	[M-H]-	441.08	295.05
Epicatechin gallate	Flavonoids	50400000	Positive	442.09	[M+H]+	443.1	123.04
Menatetrenone (Vitamin K2)	Others	127000	Positive	444.303	[M+H]+	445.3	341.3
Apigenin-7-glucuronide	Flavonoids	120000	Positive	446.085	[M+H]+	447.09	271.06
Prunetin-4'-O-glucoside	Flavonoids	47100	Negative	446.121	[M-H]-	445.11	283.06
Prunetin-5-O-glucoside	Flavonoids	20100000	Positive	446.121	[M+H]+	447.13	285.07
3'-Methoxydaidzin	Flavonoids	2850000	Positive	446.121	[M+H]+	447.13	285.07
Trifolirhizin (Maackiain-3-O-glucoside)	Flavonoids	23600	Negative	446.121	[M-H]-	445.11	283
Biochanin A-7-O-glucoside (Sissotrin)	Flavonoids	45200000	Positive	446.121	[M+H]+	447.13	285
Acacetin-7-O-glucoside (Tilianin)	Flavonoids	37000000	Positive	446.121	[M+H]+	447.13	285.18
Acacetin-7-O-galactoside	Flavonoids	49400000	Positive	446.121	[M+H]+	447.13	285.08
Luteolin-7-O-glucoside (Cynaroside)	Flavonoids	27100000	Positive	448.101	[M+H]+	449.11	287.06
Luteolin-3'-O-glucoside	Flavonoids	43000000	Positive	448.101	[M+H]+	449.11	287.06
Luteolin-4'-O-glucoside	Flavonoids	90400000	Positive	448.101	[M+H]+	449.11	287.05
Kaempferol-3-O-glucoside (Astragalin)	Flavonoids	48800000	Positive	448.101	[M+H]+	449.11	287.06
Carthamone	Flavonoids	949000	Negative	448.101	[M-H]-	447.09	285.04
Luteolin-6-C-glucoside (Isoorientin)	Flavonoids	50800	Negative	448.101	[M-H]-	447.09	357.1
Luteolin-8-C-glucoside (orientin)	Flavonoids	28300	Positive	448.101	[M+H]+	449.11	299.2
HydroxyAloe-emodin-8-O-glucoside	Quinones	752000	Negative	448.101	[M-H]-	447.09	285.04
Kaempferol-3-O-galactoside (Trifolin)	Flavonoids	596000	Negative	448.101	[M-H]-	447.09	285
Quercetin-3-O-rhamnoside(Quercitrin)	Flavonoids	16300000	Positive	448.101	[M+H]+	449.11	303.05
Kaempferol-7-O-glucoside	Flavonoids	5690000	Negative	448.101	[M-H]-	447.09	285.04
Kaempferol-4'-O-glucoside	Flavonoids	27400000	Positive	448.101	[M+H]+	449.11	287.06
8-O-methyl-7-hydroxyaloin	Quinones	471000	Positive	448.137	[M+H]+	449.14	287.09
Isosakuranetin-7-O-glucoside (Isosakuranin)	Flavonoids	2770000	Positive	448.137	[M+H]+	449.14	287.1
Sakuranin	Flavonoids	163000	Negative	448.137	[M-H]-	447.13	285.08
Dihydrokaempferol-3-O-glucoside	Flavonoids	820000	Positive	450.116	[M+H]+	451.12	289.08
Taxifolin-3-O-rhamnoside (Astilbin)	Flavonoids	38100	Negative	450.116	[M-H]-	449.11	151
Eriodictyol-8-C-glucoside	Flavonoids	173000	Negative	450.116	[M-H]-	449.11	287
Aromadendrin-7-O-glucoside	Flavonoids	68700	Negative	450.116	[M-H]-	449.1	287.05
6-C-Glucosyl-2-Hydroxynaringenin	Flavonoids	70000	Negative	450.116	[M-H]-	449.11	269.05
eriodictyol 7-O-β-D-glucopyranoside	Flavonoids	777000	Positive	450.116	[M+H]+	451.12	289.07
LysoPE 16:1*	Lipids	253000	Positive	451.27	[M+H]+	452.28	311.26
LysoPE 16:1(2n isomer)*	Lipids	1100000	Positive	451.27	[M+H]+	452.28	311.26
Epicatechin glucoside	Flavonoids	359000	Negative	452.131	[M-H]-	451.12	289.07
4-hydroxy-3-methoxyphenyl 1-O-β-D-(6'-O-galloyol)-glucopyranoside	Phenolic acids	140000	Negative	454.111	[M-H]-	453.1	313.05
Sanguisorbigenin	Terpenoids	77100	Positive	454.345	[M+H]+	455.35	409.35
Epicatechin-3-(3''-O-methyl)gallate	Flavonoids	28900	Negative	455.098	[M-H]-	455.1	289.07
L-Aspartic acid-O-diglucoside	Amino acids and derivatives	1410000	Positive	457.143	[M+H]+	458.1	116.3
Epigallocatechin-3-gallate*	Flavonoids	47200000	Negative	458.085	[M-H]-	457.08	169.01
Gallocatechin gallate*	Flavonoids	47500000	Positive	458.085	[M+H]+	459.09	139.04
Gallocatechin 3-O-gallate	Flavonoids	59200000	Negative	458.085	[M-H]-	457.08	169.02
Scutellarein-7-O-glucuronide (Scutellarin)	Flavonoids	591000	Positive	462.08	[M+H]+	463.09	287.06
Kaempferol-7-O-glucuronide	Flavonoids	350000	Positive	462.08	[M+H]+	463.09	287.05
Luteolin-7-O-glucuronide	Flavonoids	578000	Positive	462.08	[M+H]+	463.09	287.06
Demethylwedelolactone-3-O-glucoside	Lignans and Coumarins	74200	Negative	462.08	[M-H]-	461.07	401.18
Pratensein-7-O-glucoside	Flavonoids	5700000	Positive	462.115	[M+H]+	463.12	301.07
Yuanhuanin	Flavonoids	762000	Positive	462.116	[M+H]+	463.12	301.08
8-Methoxykaempferol-7-O-rhamnoside	Flavonoids	322000	Negative	462.116	[M-H]-	461.11	315.05
1-O-Galloyl-2-O-Cinnamoyl-β-D-glucose	Phenolic acids	35500	Negative	462.116	[M-H]-	461.11	169.01
Diosmetin-7-O-glucoside	Flavonoids	30600000	Positive	462.116	[M+H]+	463.12	301.07
6-C-MethylKaempferol-3-glucoside	Flavonoids	35700000	Positive	462.116	[M+H]+	463.12	301.08
Tectoridin	Flavonoids	761000	Positive	462.116	[M+H]+	463.12	301.09
Diosmetin-7-O-galactoside	Flavonoids	30900000	Positive	462.116	[M+H]+	463.12	301.07
Diosmetin-6-C-glucoside	Flavonoids	42500	Positive	462.116	[M+H]+	463.12	427.1
Hispidulin-7-O-Glucoside	Flavonoids	37700000	Positive	462.118	[M+H]+	463.13	301.07
Farrerol-7-O-glucoside	Flavonoids	858000	Positive	462.152	[M+H]+	463.16	301.11
decaffeoylverbascoside	Phenolic acids	1920000	Negative	462.174	[M-H]-	461.17	135.04
Verbasoside	Phenolic acids	381000	Negative	462.174	[M-H]-	461.17	315.1
Melilotoside C	Others	1460000	Positive	462.262	[M+H]+	463.27	301.07
Quercetin-5-O-β-D-glucoside*	Flavonoids	107000000	Positive	464.095	[M+H]+	465.1	303.05
Isohyperoside*	Flavonoids	109000000	Positive	464.095	[M+H]+	465.1	303.06
6-Hydroxykaempferol-7-O-glucoside	Flavonoids	4170000	Positive	464.095	[M+H]+	465.1	303.1
Quercetin-7-O-glucoside	Flavonoids	8120000	Negative	464.095	[M-H]-	463.09	301.03
Myricetin-3-O-rhamnoside (Myricitrin)	Flavonoids	20500000	Negative	464.095	[M-H]-	463.09	316.03
Quercetin-3-O-glucoside (Isoquercitrin)*	Flavonoids	102000000	Positive	464.095	[M+H]+	465.1	303.05
LysoPE 17:1*	Lipids	34400	Positive	465.286	[M+H]+	466.29	325.27
LysoPE 17:1(2n isomer)*	Lipids	626000	Positive	465.286	[M+H]+	466.29	325.27
Taxifolin-3'-O-glucoside	Flavonoids	282000	Negative	466.111	[M-H]-	465.13	303.06
Galloylisorhamnetin	Flavonoids	83800	Positive	468.069	[M+H]+	469.13	317.08
Isorhamnetin-3-O-gallate	Flavonoids	59600	Positive	468.113	[M+H]+	469.12	317.08
Camaldulenic acid	Terpenoids	399000	Negative	470.34	[M-H]-	469.33	469.33
Pomonic acid	Terpenoids	109000	Positive	470.34	[M+H]+	471.35	205.16
2,3-Dihydroxy-5(6),12(13)-diene-ursolic acid	Terpenoids	19800	Negative	470.34	[M-H]-	469.33	423.33
2,3-Dihydroxy-12-ursen-28-oic acid	Terpenoids	4340000	Negative	472.355	[M-H]-	471.34	471.34
Rubusic acid (3β,7α-Dihydroxyolean-12-en-28-oic acid)	Terpenoids	204000	Negative	472.355	[M-H]-	471.35	277.22
Sumaresinolic acid	Terpenoids	278000	Positive	472.355	[M+H]+	473.36	205.16
19α-Hydroxyursolic acid	Terpenoids	122000	Positive	472.355	[M+H]+	473.36	205.16
Pomolic acid	Terpenoids	4320000	Negative	472.355	[M-H]-	471.35	471.35
2-Hydroxyoleanolic acid	Terpenoids	3470000	Negative	472.355	[M-H]-	471.35	471.35
Corosolic acid	Terpenoids	3760000	Negative	472.355	[M-H]-	471.35	471.35
Siaresinolic acid	Terpenoids	55800	Positive	472.355	[M+H]+	473.36	205.16
10-Formyltetrahydrofolic Acid	Alkaloids	598000	Positive	473.166	[M+H]+	474.17	327
Trigallic acid	Phenolic acids	179000	Negative	474.043	[M-H]-	473.04	169
Apigenin-7-O-(6''-acetyl)glucoside	Flavonoids	174000	Positive	474.116	[M+H]+	475.12	271.06
LysoPE 18:3(2n isomer)*	Lipids	19200000	Positive	475.27	[M+H]+	476.28	335.26
LysoPE 18:3*	Lipids	15700000	Positive	475.27	[M+H]+	476.28	335.26
Dihydroxy-dimethoxyflavone-7-O-glucoside	Flavonoids	180000	Positive	476.131	[M+H]+	477.14	315.1
5,2'-Dihydroxy-7,8-dimethoxyflavone glycosides	Flavonoids	176000	Positive	476.132	[M+H]+	477.14	315.08
Agrimonolide-6-O-β-D-glucopyranoside	Lignans and Coumarins	311000	Positive	476.168	[M+H]+	477.18	315.12
Quercetin-5-O-glucuronide	Flavonoids	54800000	Positive	478.075	[M+H]+	479.08	303.06
3,4-Digalloylshikimic acid	Phenolic acids	3840000	Negative	478.075	[M-H]-	477.06	169.01
6-Methoxykaempferol-3-O-glucoside	Flavonoids	400000	Positive	478.111	[M+H]+	479.12	317.07
Rhamnetin-3-O-Glucoside	Flavonoids	509000	Positive	478.111	[M+H]+	479.12	317.07
Isorhamnetin-3-O-Glucoside	Flavonoids	8460000	Positive	478.111	[M+H]+	479.12	317.06
Isorhamnetin-7-O-glucoside (Brassicin)	Flavonoids	7890000	Positive	478.111	[M+H]+	479.12	317.06
Nepetin-7-O-alloside	Flavonoids	7160000	Positive	478.112	[M+H]+	479.12	317.06
Nepetin-7-O-glucoside(Nepitrin)	Flavonoids	399000	Positive	478.112	[M+H]+	479.12	317.06
Desrhamnosylacteoside	Phenolic acids	54900	Positive	478.147	[M+H]+	479.16	163.04
Desrhamnosylisoacteoside	Phenolic acids	6070000	Positive	478.147	[M+H]+	479.16	163.04
Persicoside	Flavonoids	138000	Negative	478.148	[M-H]-	477.14	315
1'-O-(3,4-Dihydroxyphenethyl)-O-caffeoyl-glucoside	Phenolic acids	2970000	Negative	478.148	[M-H]-	477.14	179.03
3,5-Digalloylshikimic acid	Phenolic acids	32600	Negative	478.148	[M-H]-	477.14	169
3',5',5,7-Tetrahydroxy-4'-methoxyflavanone-3'-O-glucoside	Flavonoids	19100000	Positive	480.127	[M+H]+	481.13	319.05
LysoPC 15:0(2n isomer)	Lipids	412000	Positive	481.317	[M+H]+	482.32	184.07
4,6-(S)-Hexahydroxydiphenoyl-β-D-glucose	Phenolic acids	384000	Negative	482.07	[M-H]-	481.06	301
4,6-(S)-Hexahydroxydiphenoyl-D-glucose	Phenolic acids	135000	Negative	482.07	[M-H]-	481.06	275
5-O-p-Coumaroylshikimic acid O-glucoside	Phenolic acids	56900	Negative	482.142	[M-H]-	481.14	319.2
1,6-di-O-galloyl-β-D-glucose	Phenolic acids	3430000	Negative	484.085	[M-H]-	483.08	169.01
LysoPG 16:0	Lipids	89700	Negative	484.278	[M-H]-	483.27	255.23
2α,19α-Dihydroxy-3-oxours-12-en-28-oic acid	Terpenoids	110000	Negative	486.335	[M-H]-	485.33	485.33
Asiatic acid	Terpenoids	35200	Negative	488.35	[M-H]-	487.34	425.34
Tormentic acid	Terpenoids	97600	Negative	488.35	[M-H]-	487.34	469.33
2α,3α-Dihydroxyursolic acid	Terpenoids	105000	Negative	488.35	[M-H]-	487.34	469.33
2α,3α,23-trihydroxyolean-12-en-28-oic acid	Terpenoids	1490000	Negative	488.35	[M-H]-	487.34	487.34
Arjunolic acid	Terpenoids	30200	Positive	488.35	[M+H]+	489.36	407.33
Madasiatic acid	Terpenoids	1550000	Negative	488.35	[M-H]-	487.35	487.35
Euscaphic acid	Terpenoids	51400	Negative	488.35	[M-H]-	487.34	469.23
2α,3α,19α-trihydroxyursolic acid	Terpenoids	78500	Positive	488.35	[M+H]+	489.36	407.33
Kaempferol-3-O-(6''-acetyl)glucoside	Flavonoids	49800	Negative	490.111	[M-H]-	489.11	285.04
4',5'-Dihydroxy-6,8-dimethoxyisoflavone-7-O-galactoside	Flavonoids	1520000	Positive	492.127	[M+H]+	493.13	331.08
5,7,4'-Trihydroxy-6,8-dimethoxyisoflavone-7-O-galactoside	Flavonoids	1480000	Positive	492.127	[M+H]+	493.13	331.08
Tricin-7-O-Glucoside	Flavonoids	2110000	Positive	492.127	[M+H]+	493.13	331.08
Jaceosidin-7-O-Glucoside	Flavonoids	1610000	Positive	492.128	[M+H]+	493.14	331.08
LysoPC 16:1	Lipids	5180000	Positive	493.317	[M+H]+	494.32	184.07
LysoPC 16:1(2n isomer)	Lipids	15700000	Positive	493.317	[M+H]+	494.32	184.07
Laricitrin-3-O-glucoside	Flavonoids	438000	Positive	494.105	[M+H]+	495.11	333.07
1-O-Caffeoyl-4-O-galloyl-β-D-glucose	Phenolic acids	7500000	Negative	494.106	[M-H]-	493.1	169.01
Mearnsetin-3-O-glucoside	Flavonoids	98200	Negative	494.106	[M-H]-	493.1	331.05
Monogalloyl-diglucose	Phenolic acids	199000	Negative	494.127	[M-H]-	493.12	169.01
Mucic acid-1,4-lactone-3,5-di-O-gallate	Phenolic acids	829000	Negative	496.049	[M-H]-	495.04	191.02
3-O-Digalloyl quinic acid	Phenolic acids	1320000	Negative	496.085	[M-H]-	495.08	343.07
Dicaffeoylshikimic acid	Phenolic acids	6060000	Positive	498.116	[M+H]+	499.13	163.04
5-O-p-Coumaroylquinic acid O-glucoside	Phenolic acids	157000	Negative	500.153	[M-H]-	499.15	163.1
LysoPE 20:3(2n isomer)	Lipids	77100	Positive	503.301	[M+H]+	504.31	363.29
Maltotriose	Others	20400	Positive	504.169	[M+Na]+	527.16	365.1
Raffinose	Others	65500	Negative	504.169	[M-H]-	503.16	179
LysoPC 17:2	Lipids	547000	Positive	505.317	[M+H]+	506.32	184.07
LysoPE 20:2(2n isomer)*	Lipids	113000	Positive	505.317	[M+H]+	506.32	365.31
LysoPE 20:2*	Lipids	130000	Positive	505.317	[M+H]+	506.32	365.31
Quercetin-3-O-(6''-O-acetyl)glucoside	Flavonoids	97600	Positive	506.106	[M+H]+	507.12	303.05
Chestnutlignansoide	Lignans and Coumarins	1970000	Negative	506.215	[M-H]-	505.3	343.16
LysoPC 17:1	Lipids	1290000	Positive	507.332	[M+H]+	508.34	184.07
Limocitrin-3-O-galactoside	Flavonoids	422000	Positive	508.121	[M+H]+	509.13	347.07
Syringetin-7-O-glucoside	Flavonoids	647000	Positive	508.122	[M+H]+	509.13	347.08
Okanin-4'-(6''-O-acetyl)glucoside	Flavonoids	680000	Positive	508.122	[M+H]+	509.13	347.08
LysoPC 17:0(2n isomer)	Lipids	657000	Positive	509.348	[M+H]+	510.36	184.07
p-Coumaroylquinic acid-4'-O-glucuronide	Phenolic acids	43100000	Negative	514.132	[M-H]-	513.1	191.1
2-α-Linolenoyl-glycerol-1-O-glucoside*	Lipids	4460000	Positive	514.314	[M+H]+	515.32	261.22
1-α-Linolenoyl-glycerol-3-O-glucoside*	Lipids	4460000	Positive	514.314	[M+H]+	515.32	261.22
LysoPC 18:4	Lipids	257000	Positive	515.297	[M+H]+	516.3	184.07
3,5-Dicaffeoylquinic acid	Phenolic acids	296000	Negative	516.127	[M-H]-	515.12	353.09
Isochlorogenic acid B*	Phenolic acids	89100000	Negative	516.127	[M-H]-	515.12	353.09
1,3-O-Dicaffeoylquinic Acid (Cynarin)	Phenolic acids	866000	Negative	516.127	[M-H]-	515.12	191.05
Isochlorogenic acid C*	Phenolic acids	32900000	Positive	516.127	[M+H]+	517.13	163.04
2-Linoleoylglycerol-1-O-glucoside*	Lipids	133000	Positive	516.33	[M+H]+	517.34	263.24
1-Linoleoylglycerol-3-O-glucoside*	Lipids	135000	Positive	516.33	[M+H]+	517.34	263.24
Phellamurin	Flavonoids	633000	Positive	518.179	[M+H]+	519.19	357.13
LysoPC 18:2(2n isomer)	Lipids	26100000	Positive	519.332	[M+H]+	520.34	184.07
Matairesinol-4'-O-glucoside (Matairesinoside)	Lignans and Coumarins	165000	Positive	520.168	[M+NH4]+	538.22	359.14
(7S,8R)-dehydrodiconiferylalcohol-9'-O-β-D-glucopyranoside	Phenolic acids	808000	Negative	520.194	[M-H]-	519.19	357.13
(-)-Pinoresinol-O-β-D-glucopyranoside	Lignans and Coumarins	54200	Positive	520.194	[M+H]+	521.2	359.15
Pinoresinol-4-O-glucoside	Lignans and Coumarins	382000	Negative	520.194	[M-H]-	519.19	357.14
LysoPC 18:1(2n isomer)*	Lipids	96700000	Positive	521.348	[M+H]+	522.36	184.07
LysoPC 18:1*	Lipids	47000000	Positive	521.348	[M+H]+	522.36	184.07
Rosmarinic acid-3'-O-glucoside	Phenolic acids	113000	Negative	522.137	[M-H]-	521.13	359.08
Isolariciresinol-9-O-glucoside	Lignans and Coumarins	68300	Positive	522.21	[M+H]+	523.23	137.06
Dihydrodehydrodiconiferyl alcohol-4-O-glucoside	Lignans and Coumarins	129000	Negative	522.21	[M-H]-	521.2	359.15
Isolariciresinol-9'-O-glucoside	Lignans and Coumarins	147000	Negative	522.21	[M-H]-	521.2	359.15
Secoisolariciresinol 4-O-glucoside	Lignans and Coumarins	77700	Negative	524.226	[M-H]-	523.21	361.14
3,5-O-Dicaffeoylquinic Acid Methyl Ester	Phenolic acids	2010000	Positive	530.142	[M+H]+	531.15	177.06
LysoPC 19:3	Lipids	48000	Positive	531.332	[M+H]+	532.34	184.07
Fraxetin-7,8-di-O-glucoside	Lignans and Coumarins	72100	Negative	532.143	[M-H]-	531.14	531.13
LysoPC 19:2(2n isomer)*	Lipids	10600000	Positive	533.348	[M+H]+	534.36	184.07
LysoPC 19:2*	Lipids	3080000	Positive	533.348	[M+H]+	534.36	184.07
Apigenin-6-C-arabinoside-8-C-xyloside	Flavonoids	7160000	Positive	534.137	[M+H]+	535.14	499.12
Arctiin	Lignans and Coumarins	540000	Negative	534.21	[M-H]-	533.2	371
LysoPC 19:1	Lipids	454000	Positive	535.364	[M+H]+	536.37	184.07
Eriodictyol-7-O-(6''-malonyl)glucoside	Flavonoids	21800	Positive	536.117	[M+H]+	537.12	289
Nortrachelogenin-4-O-glucoside	Lignans and Coumarins	21000	Negative	536.189	[M-H]-	535.18	373.13
Salvianolic acid I	Phenolic acids	22900	Negative	538.111	[M-H]-	537.1	339.05
Ikarisoside D	Flavonoids	921000	Positive	542.179	[M+H]+	543.19	381.13
LysoPC 20:3	Lipids	686000	Positive	545.348	[M+H]+	546.36	184.07
LysoPC 20:1	Lipids	251000	Positive	549.379	[M+H]+	550.39	184.07
5'-Methoxymatairesinoside	Lignans and Coumarins	417000	Negative	550.204	[M-H]-	549.2	387.15
Eucommin A	Lignans and Coumarins	48800	Negative	550.205	[M-H]-	549.2	387.15
Isoschaftoside	Flavonoids	2210000	Positive	564.123	[M+H]+	565.16	409.09
Theaflavin	Tannins	76300	Positive	564.127	[M+H]+	565.13	139.1
Isovitexin-8-O-xyloside	Flavonoids	63800	Positive	564.148	[M+H]+	565.16	367.1
Apigenin-6-C-(2''-glucosyl)arabinoside	Flavonoids	3540000	Positive	564.148	[M+H]+	565.16	427.1
Phloretin-2'-O-(6''-O-xylosyl)glucoside	Flavonoids	48200	Negative	568.179	[M-H]-	567.17	273.08
Procyanidin B4*	Tannins	146000	Negative	578.142	[M-H]-	577.14	407.1
Procyanidin B1*	Tannins	1040000	Negative	578.142	[M-H]-	577.14	425.1
Procyanidin B3*	Tannins	2530000	Negative	578.142	[M-H]-	577.14	407.1
Procyanidin B2*	Tannins	4000000	Positive	578.142	[M+H]+	579.15	409.09
Apigenin-7-O-(6''-p-Coumaryl)glucoside	Flavonoids	50700000	Positive	578.142	[M+H]+	579.15	271.06
Apigenin-7-O-neohesperidoside (Rhoifolin)*	Flavonoids	51500000	Positive	578.164	[M+H]+	579.17	271.07
Genistein-7-O-galactoside-rhamnose	Flavonoids	51400000	Positive	578.164	[M+H]+	579.17	271.06
Apigenin-7-O-rutinoside (Isorhoifolin)*	Flavonoids	60300000	Positive	578.164	[M+H]+	579.17	271.01
Epitheaflavic acid-3-O-Gallate	Flavonoids	36200000	Negative	580.085	[M-H]-	579.08	289.07
Kaempferol-3-O-sambubioside	Flavonoids	7830000	Positive	580.142	[M+H]+	581.15	287.06
isocarlinoside	Flavonoids	35600	Positive	580.143	[M+H]+	581.14	413.08
Gambiriin A1	Tannins	807000	Positive	580.158	[M+H]+	581.17	139.04
Isosalipurposide-6''-O-p-coumaric acid	Flavonoids	192000	Positive	580.158	[M+H]+	581.17	147.04
Naringenin-7-O-Neohesperidoside(Naringin)*	Flavonoids	103000	Negative	580.179	[M-H]-	579.17	271.06
Naringenin-7-O-Rutinoside(Narirutin)*	Flavonoids	145000	Negative	580.179	[M-H]-	579.17	271
Syringaresinol-4'-O-glucoside	Lignans and Coumarins	297000	Negative	580.216	[M-H]-	579.21	417.16
N',N'',N'''-p-Coumaroyl-cinnamoyl-caffeoyl spermidine	Alkaloids	106000	Positive	583.268	[M+H]+	584.28	325
3-Hydroxy-5-Methylphenol-1-O-(6'-Digalloyl)Glucoside	Phenolic acids	65000	Negative	590.127	[M-H]-	589.12	437.1
8,8'-Methylenebiscatechin	Flavonoids	56800	Positive	592.158	[M+H]+	593.17	441.11
Procyanidin A6	Tannins	55200	Negative	592.158	[M-H]-	591.15	289.07
Chrysoeriol-6-C-rhamnoside-7-O-rhamnoside	Flavonoids	87800000	Positive	592.177	[M+H]+	593.18	447.13
Robinson-7-O-Neohesperidin	Flavonoids	96600000	Positive	592.179	[M+H]+	593.19	285.08
Acacetin-7-O-rutinoside (Linarin)	Flavonoids	109000000	Positive	592.179	[M+H]+	593.19	285.1
7,4'-Di-O-galloyltricetiflavan	Flavonoids	1840000	Negative	594.101	[M-H]-	593.09	289.07
Luteolin-7-O-(6''-caffeoyl)rhamnoside	Flavonoids	2310000	Negative	594.137	[M-H]-	593.13	285.04
Kaempferol-3-O-(6''-p-Coumaroyl)glucoside (Tiliroside)	Flavonoids	5400000	Negative	594.137	[M-H]-	593.13	285
Kaempferol-3-O-(6''-p-Coumaroyl)galactoside	Flavonoids	13600000	Positive	594.137	[M+H]+	595.14	287.06
Kaempferol-3-O-(2''-p-Coumaroyl)galactoside	Flavonoids	489000	Positive	594.137	[M+H]+	595.14	287.05
Biondnoid I	Flavonoids	4660000	Positive	594.137	[M+H]+	595.14	147
Luteolin-7-O-rutinoside	Flavonoids	4700000	Positive	594.158	[M+H]+	595.17	449.1
vitexin-2''-O-glucoside	Flavonoids	796000	Positive	594.158	[M+H]+	595.17	577.16
Isovitexin-7-O-glucoside(Saponarin)	Flavonoids	41900	Positive	594.158	[M+H]+	595.16	313.07
Luteolin-7-O-neohesperidoside (Lonicerin)	Flavonoids	5090000	Positive	594.158	[M+H]+	595.17	449.1
Kaempferol-3-O-rutinoside(Nicotiflorin)*	Flavonoids	37700000	Positive	594.158	[M+H]+	595.17	287.05
Kaempferol-3-O-rhamnosyl(1→2)glucoside	Flavonoids	38700	Positive	594.158	[M+H]+	595.16	287.05
Kaempferol-3-O-glucoside-7-O-rhamnoside*	Flavonoids	34500000	Positive	594.158	[M+H]+	595.17	287.06
4'-O-Glucosylvitexin	Flavonoids	2820000	Positive	594.158	[M+H]+	595.17	433.12
Kaempferol-3-O-robinobioside(Biorobin)	Flavonoids	2010000	Negative	594.158	[M-H]-	593.15	285
Luteolin-6-C-glucoside-7-O-rhamnoside	Flavonoids	33600	Positive	594.158	[M+H]+	595.17	449.11
Kaempferol-3-O-neohesperidoside*	Flavonoids	34800000	Positive	594.158	[M+H]+	595.17	287.05
Apigenin-6,8-di-C-glucoside (Vicenin-2)	Flavonoids	2610000	Positive	594.158	[M+H]+	595.17	457.2
Isosaponarin(Isovitexin-4'-O-glucoside)	Flavonoids	1180000	Positive	594.158	[M+H]+	595.17	313.07
Didymin (Isosakuranetin-7-O-rutinoside)	Flavonoids	2580000	Negative	594.195	[M-H]-	593.19	285.08
Poncirin (Isosakuranetin-7-O-neohesperidoside)	Flavonoids	5180000	Negative	594.195	[M-H]-	593.19	285
Quercetin-3-O-sambubioside	Flavonoids	25800000	Positive	596.138	[M+H]+	597.14	303.05
Quercetin-3-O-apiosyl(1→2)galactoside	Flavonoids	29700000	Positive	596.138	[M+H]+	597.14	303.04
"Eriodictyol-7-O-(6""-O-p-coumaroyl)glucoside"	Flavonoids	30000	Negative	596.153	[M-H]-	595.15	287.06
Kaempferol-3-O-(6''-galloyl)glucoside*	Flavonoids	275000	Positive	600.112	[M+H]+	601.12	287.06
Kaempferol-3-O-(2''-galloyl)galactoside*	Flavonoids	362000	Positive	600.112	[M+H]+	601.12	287.06
Uridine 5'-diphospho-N-acetylglucosamine	Nucleotides and derivatives	27300	Negative	607.082	[M-H]-	606.08	384.98
Chrysoeriol-7-O-rutinoside	Flavonoids	1800000	Negative	608.174	[M-H]-	607.17	299
Diosmetin-7-O-Neohesperidoside (Neodiosmin)	Flavonoids	18800000	Positive	608.174	[M+H]+	609.18	301.08
Diosmetin-7-O-rutinoside (Diosmin)	Flavonoids	35600000	Positive	608.174	[M+H]+	609.18	301
Hispidulin-7-O-(6''-O-p-Coumaroyl)Glucoside	Flavonoids	18800000	Positive	608.176	[M+H]+	609.18	463.08
Quercetin-3-O-(6''-O-p-Coumaroyl)galactoside	Flavonoids	4510000	Positive	610.132	[M+H]+	611.14	147.04
Gallocatechin-(4α→8)-gallocatechin	Flavonoids	286000	Positive	610.132	[M+H]+	611.14	287.05
Quercetin-3-O-(6''-O-p-Coumaroyl)glucoside	Flavonoids	264000	Positive	610.132	[M+H]+	611.14	147.04
Quercetin-3-O-rutinoside (Rutin)	Flavonoids	58500000	Positive	610.153	[M+H]+	611.16	303.05
Orientin-2''-O-galactoside	Flavonoids	79200	Positive	610.153	[M+H]+	611.16	449.11
Luteolin-6,8-di-C-glucoside	Flavonoids	47100	Positive	610.153	[M+H]+	611.16	593.2
Kaempferol-3,7-O-diglucoside	Flavonoids	172000	Positive	610.153	[M+H]+	611.16	287.05
Luteolin-7-O-gentiobioside	Flavonoids	167000	Positive	610.153	[M+H]+	611.16	287.05
Quercetin-3-O-robinobioside	Flavonoids	16200000	Negative	610.153	[M-H]-	609.15	300
Quercetin-3-O-neohesperidoside	Flavonoids	802000	Positive	610.153	[M+H]+	611.16	303.05
Quercetin-3-O-(4''-O-glucosyl)rhamnoside	Flavonoids	56300000	Positive	610.153	[M+H]+	611.16	303.05
Kaempferol-3-O-sophoroside	Flavonoids	102000	Negative	610.154	[M-H]-	609.15	285.04
4-O-(6'-O-Glucosylcaffeoylglucosyl)-4-hydroxybenzyl alcohol	Phenolic acids	103000	Negative	610.189	[M-H]-	609.18	447.13
Hesperetin-7-O-neohesperidoside(Neohesperidin)	Flavonoids	1330000	Negative	610.19	[M-H]-	609.18	301
Hesperetin-7-O-rutinoside (Hesperidin)	Flavonoids	1330000	Negative	610.19	[M-H]-	609.18	301.09
Oxiglutatione	Amino acids and derivatives	61200	Negative	612.152	[M-H]-	611.14	306.08
1,6-Di-O-galloyl-3-O-Cinnamoyl-β-D-glucose	Phenolic acids	36000	Negative	614.127	[M-H]-	613.12	169.01
Quercetin-3-O-(6''-O-galloyl)glucoside*	Flavonoids	553000	Positive	616.106	[M+H]+	617.11	153.02
Quercetin-3-O-(6''-O-galloyl)galactoside*	Flavonoids	469000	Positive	616.106	[M+H]+	617.11	153.02
Apigenin-7-O-(2''-glucurosyl)glucuronide	Flavonoids	152000	Positive	622.117	[M+H]+	623.12	271.06
Isorhamnetin-3-O-rutinoside (Narcissin)	Flavonoids	1740000	Positive	624.162	[M+H]+	625.18	317.06
Isorhamnetin-3-O-neohesperidoside	Flavonoids	1800000	Positive	624.169	[M+H]+	625.17	317.07
Tamarixetin-3-O-glucoside-7-O-rhamnoside	Flavonoids	1630000	Positive	624.169	[M+H]+	625.18	317.07
2'-Hydoxy,5-methoxyGenistein-O-rhamnosyl-glucoside	Flavonoids	1630000	Positive	624.169	[M+H]+	625.17	317.06
Sexangularetin-3-O-glucoside-7-O-rhamnoside	Flavonoids	1750000	Positive	624.169	[M+H]+	625.18	317.07
Isoacteoside	Phenolic acids	10200000	Positive	624.205	[M+H]+	625.21	163.03
Hesperidin methylchalcone	Flavonoids	592000	Positive	624.205	[M+H]+	625.22	317.1
Acteoside	Phenolic acids	10600000	Positive	624.205	[M+H]+	625.21	163.04
Grossamide	Alkaloids	175000	Positive	624.247	[M+H]+	625.26	325.11
6-Hydroxykaempferol-6,7-O-Diglucoside	Flavonoids	1520000	Positive	626.148	[M+H]+	627.16	303.05
Quercetin-3,7-Di-O-glucoside	Flavonoids	238000	Positive	626.148	[M+H]+	627.14	303.05
Myricetin-3-O-galactoside-3'-O-rhamnoside	Flavonoids	77600	Positive	626.148	[M+H]+	627.16	319.05
6-Hydroxykaempferol-3,6-O-Diglucoside	Flavonoids	753000	Positive	626.148	[M+H]+	627.16	303.1
Myricetin-3-O-rutinoside	Flavonoids	77200	Positive	626.148	[M+H]+	627.16	319.05
3-O-p-Coumaroyl-4,6-(S)-HHDP-β-D-glucose	Phenolic acids	19900	Positive	628.106	[M+H]+	629.11	163.04
3,4,5-Tri-O-Galloylshikimic acid	Phenolic acids	128000	Negative	630.086	[M-H]-	629.08	169
Strictinin	Tannins	10100000	Negative	634.079	[M-H]-	633.07	301
Gemin D	Tannins	80100	Negative	634.08	[M-H]-	633.08	301
Corilagin	Tannins	503000	Positive	634.081	[M+H]+	635.09	277.03
Sanguiin H4	Tannins	12300000	Negative	634.081	[M-H]-	633.08	301.01
1-O-Galloyl-4,6-hexahydroxydiphenoyl-D-glucose	Phenolic acids	2250000	Negative	634.081	[M-H]-	633.07	275
Isocorilagin	Tannins	9630000	Negative	634.081	[M-H]-	633.07	301
Isostrictinin	Tannins	85700	Negative	634.081	[M-H]-	633.07	301
1,2,3-Tri-O-galloyl-D-glucose	Phenolic acids	396000	Negative	636.096	[M-H]-	635.09	169.01
β-Oxoacteoside	Phenolic acids	55100	Negative	638.184	[M-H]-	637.18	475.14
campneoside II	Phenolic acids	229000	Negative	640.2	[M-H]-	639.19	621.18
Plantamajoside	Phenolic acids	235000	Negative	640.2	[M-H]-	639.19	161
(S)-Campneoside II	Phenolic acids	300000	Negative	640.201	[M-H]-	639.2	621.18
D(+)-Melezitose O-rhamnoside	Others	29400	Negative	650.227	[M-H]-	649.1	145
2'-Acetylacteoside	Phenolic acids	31000	Negative	666.216	[M-H]-	665.21	161.02
1-(9Z-Octadecenoyl)-2-(9-oxo-nonanoyl)-sn-glycero-3-phosphocholine	Lipids	22500	Positive	675.448	[M+H]+	676.45	184.08
2-α-Linolenoyl-glycerol-1,3-di-O-glucoside*	Lipids	2840000	Positive	676.367	[M+H]+	677.37	261.22
1-α-Linolenoyl-glycerol-2,3-di-O-glucoside*	Lipids	2530000	Positive	676.367	[M+H]+	677.37	261.22
Dicaffeoylquinic acid-O-glucoside	Phenolic acids	118000	Negative	678.18	[M-H]-	677.17	191.06
2-Linoleoylglycerol-1,3-di-O-glucoside*	Lipids	236000	Positive	678.383	[M+H]+	679.39	263.24
1-Linoleoylglycerol-2,3-di-O-glucoside*	Lipids	234000	Positive	678.383	[M+H]+	679.39	263.24
Pinoresinol-4,4'-O-di-O-glucoside	Lignans and Coumarins	46800	Negative	682.247	[M-H]-	681.24	519.19
Syringoylcaffeoylquinic acid-D-glucose	Phenolic acids	559000	Negative	696.19	[M-H]-	695.2	353.09
1-Hydroxypineolin Diglucoside	Lignans and Coumarins	176000	Negative	698.242	[M-H]-	697.23	535.18
Nortrachelogenin-4'-O-gentiobioside	Lignans and Coumarins	483000	Negative	698.242	[M-H]-	697.24	535.18
Galloylprocyanidin B4	Tannins	2460000	Negative	730.153	[M-H]-	729.15	407.07
Castanoside B [Kaempferol-3-O-(4'',6''-di-p-coumaroyl)mannoside]	Flavonoids	2490000	Positive	740.174	[M+H]+	741.18	455.14
Luteolin-7-O-rutinoside-5-O-rhamnoside	Flavonoids	23200	Negative	740.209	[M-H]-	739.19	593.14
Kaempferol-3-O-robinoside-7-O-rhamnoside (Robinin)	Flavonoids	59600	Positive	740.216	[M+H]+	741.22	433
Kaempferol-3-O-(6''-Rhamnosyl-2''-Glucosyl)Glucoside (Camelliaside A)	Flavonoids	65300	Positive	756.211	[M+H]+	757.22	287.06
Quercetin-3-O-rutinoside-7-O-rhamnoside*	Flavonoids	1060000	Positive	756.211	[M+H]+	757.21	303.05
Quercetin-3-O-(2''-O-Rhamnosyl)rutinoside*	Flavonoids	1910000	Positive	756.212	[M+H]+	757.22	303.05
Isovitexin-2''-O-(6'''-feruloyl)glucoside	Flavonoids	108000	Positive	770.205	[M+H]+	771.21	147.04
kaempferol-3-caffeoyldiglucoside	Flavonoids	62500	Negative	772.185	[M-H]-	771.18	609.14
4-O-(6'-O-Glucosylcaffeoylglucosylferuloyl)-4-hydroxybenzyl alcohol	Phenolic acids	92300	Negative	786.238	[M-H]-	785.23	447.13
Theaflavate B;3'-O-(3,4,5-Trihydroxybenzoyl)	Tannins	719000	Negative	852.154	[M-H]-	851.15	425.09
cinnamtannin B1	Tannins	21300	Negative	864.19	[M-H]-	863.19	711.14
Arecatannin B1	Tannins	209000	Positive	866.206	[M+H]+	867.21	715.16
Catechin-catechin-catechin	Flavonoids	570000	Negative	866.206	[M-H]-	865.2	407.1
Procyanidin C2	Tannins	264000	Negative	866.206	[M-H]-	865.2	713.2
Arecatannin C1	Tannins	266000	Positive	866.206	[M+H]+	867.21	715.16
Procyanidin C1	Tannins	290000	Negative	866.206	[M-H]-	865.2	577.1
Tellimagrandin II	Tannins	35500	Negative	938.103	[M-H]-	937.1	609.15
Chebulinic acid	Tannins	107000	Negative	956.113	[M-H]-	955.11	633.08
Oleoacteoside	Phenolic acids	33200	Negative	1010.33	[M-H]-	1009.32	847.28
Procyanidin C1 3'-O-gallate	Tannins	33100	Positive	1018.22	[M+H]+	1019.22	731.16
