# Supplementary material for: Compound green tea (CGT) regulates lipid metabolism in high-fat diet induced mice
Source: Royal Society of Chemistry journal article supplement (doi:10.1039/d2ra02831j), 2022-01-01
Supplement: d2ra02831j7.xlsx [file d2ra02831j7.xlsx]

## Sheet: Sheet4
Table 2 All compounds detected in four groups
Index	Compounds	CK	DH	NK	YK
MEDN348	TXB2 [9α,11,15S-trihydroxythromba-5Z,13E-dien-1-oic acid]	1.0±0.11 b	1.2±0.18 b	3.0±0.44 a	0.7±0.11 b
MEDN349	PGD2 [9α,15S-dihydroxy-11-oxo-prosta-5Z,13E-dien-1-oic acid]	1.0±0.08 b	0.9±0.06 b	1.3±0.24 a	1.0±0.05 b
MEDN351	12-Hete	1.0±0.05 a	0.9±0.06 a	0.9±0.03 a	0.8±0.05 ab
MEDN352	O-Phosphorylethanolamine	1.0±0.07 a	0.8±0.12 ab	0.9±0.60 a	1.0±0.03 a
MEDN358	Lysops 22:5	1.0±0.14 b	0.9±0.10 b	1.3±0.38 a	1.2±0.32 ab
MEDN360	Lysopg 18:1	1.0±0.12 b	1.2±0.11 ab	1.3±0.13 a	1.2±0.33 ab
MEDN362	Lysope 18:1	1.0±0.09 ab	1.1±0.61 ab	1.3±0.12 a	1.2±0.23 a
MEDN364	Lysope 18:0	1.0±0.60 ab	1.0±0.59 ab	1.6±0.58 a	1.6±0.89 a
MEDN366	Lysope 16:0	1.0±0.62 b	0.9±0.55 b	1.6±0.58 a	1.4±0.81 ab
MEDN368	Lysope 14:0	1.0±0.09 a	0.4±0.37 ab	1.0±0.47 a	0.9±0.07 a
MEDN370	Lysopa 18:0	1.0±0.99 b	2.8±0.14 ab	3.4±0.75 ab	4.0±0.27 a
MEDN372	Lysopa 16:0	1.0±0.51 ab	0.9±0.56 ab	1.4±0.49 a	1.0±0.47 ab
MEDN375	13-HOTrE [13S-hydroxy-9Z,11E,15Z-octadecatrienoic acid]	1.0±0.30 a	0.0±0.01 b	0.0±0.00 b	0.0±0.00 b
MEDN376	9,10-DiHOME [(±)9,10-dihydroxy-12Z-octadecenoic acid]	1.0±0.89 a	0.9±0.65 a	0.8±0.25 ab	0.7±0.27 ab
MEDN378	γ-Linolenic Acid(C18:3N6)	1.0±0.44 a	0.5±0.26 ab	0.7±0.21 ab	0.6±0.26 ab
MEDN379	Tridecanoic Acid	1.0±0.43 a	0.6±0.12 ab	0.6±0.17 ab	0.8±0.12 a
MEDN380	Palmitoleic Acid (C16:1)	1.0±0.32 a	0.4±0.26 b	0.8±0.30 ab	0.9±0.52 ab
MEDN381	Hexadecanoic Acid (C16:0)	1.0±0.22 a	0.8±0.18 ab	0.9±0.15 a	0.9±0.17 a
MEDN383	Linoleic Acid (C18:2N6C)	1.0±0.16 a	0.7±0.30 ab	0.9±0.17 a	0.8±0.23 a
MEDN385	Dodecanoic Acid(C12:0)	1.0±0.39 a	0.5±0.15 ab	0.6±0.09 ab	0.5±0.13 ab
MEDN388	Elaidic Acid (C18:1N9T)	1.0±0.33 a	0.8±0.53 ab	1.1±0.14 a	0.9±0.32 ab
MEDN390	EPA [5Z,8Z,11Z,14Z,17Z-eicosapentaenoic acid]	1.0±0.60 b	2.3±0.48 a	2.3±0.59 a	2.2±0.19 a
MEDN391	DHA [4Z,7Z,10Z,13Z,16Z,19Z-docosahexaenoic acid]	1.0±0.03 a	0.8±0.06 ab	0.8±0.15 ab	1.0±0.22 a
MEDN394	Cis-11,14-Eicosadienoic Acid (C20:2)	1.0±1.09 a	0.4±0.26 b	0.3±0.17 b	0.3±0.13 b
MEDN395	Cis-11,14,17-Eicosatrienoic Acid (C20:3)	1.0±0.31 a	0.8±0.30 ab	1.1±0.17 a	0.7±0.15 ab
MEDN399	Arachidic Acid(C20:0)	1.0±0.51 a	0.8±0.46 ab	1.1±0.35 a	1.1±0.15 a
MEDN400	Α-Linolenic Acid(C18:3N3)	1.0±0.64 a	0.4±0.09 ab	0.4±0.11 ab	0.7±0.10 a
MEDN486	Palmitaldehyde	1.0±0.28 a	0.5±0.25 ab	0.8±0.31 a	0.9±0.49 a
MEDN491	9-HOTrE [9S-hydroxy-10E,12Z,15Z-octadecatrienoic acid]	1.0±0.24 a	0.7±0.12 ab	0.7±0.07 ab	0.9±0.11 a
MEDN494	8,15-Dihete	1.0±0.83 a	0.3±0.21 b	0.7±0.39 ab	0.3±0.13 b
MEDN543	3-Methyladipic acid	1.0±0.23 a	0.6±0.21 ab	1.0±0.29 a	1.0±0.27 a
MEDN544	3-Methylglutaric acid	1.0±0.83 a	0.3±0.21 b	0.7±0.39 ab	0.3±0.12 b
MEDN563	DL-Benzylsuccinic acid	1.0±0.23 a	0.6±0.40 ab	1.0±0.29 a	1.0±0.27 a
MEDN565	cis-7-Hexadecenoic Acid	1.0±0.30 a	0.4±0.28 b	0.8±0.29 ab	0.9±0.51 a
MEDN588	Glycerol 3-phosphate	1.0±0.55 ab	1.1±0.77 ab	1.7±0.15 a	1.6±0.50 a
MEDN604	Tetradecanedioic acid	1.0±0.78 a	0.4±0.14 b	0.4±0.13 b	0.3±0.06 b
MEDN605	Tiglic acid	1.0±0.78 ab	1.4±0.56 a	0.8±0.66 b	0.9±0.67 ab
MEDN613	2,2-Dimethyl Succinic acid	1.0±0.86 a	0.3±0.22 b	0.7±0.42 ab	0.2±0.14 b
MEDN658	Hexadecanedioic acid	1.0±0.94 a	0.5±0.34 ab	0.5±0.25 ab	0.2±0.09 b
MEDN667	PE(18:1(9Z)/0:0)	1.0±0.65 b	1.5±1.13 b	2.5±0.76 a	2.6±1.82 a
MEDN673	Isopropyl myristate	1.0±0.16 a	0.7±0.16 ab	0.8±0.14 a	0.8±0.12 a
MEDN675	Methylstearate	1.0±0.39 a	0.6±0.29 b	1.0±0.17 a	1.1±0.28 a
MEDN682	Octadecanamide	1.0±0.12 a	1.0±0.13 a	1.1±0.08 a	1.1±0.12 a
MEDN714	MethylLinolenate	1.0±0.13 a	1.0±0.14 a	0.9±0.05 ab	1.1±0.23 a
MEDN727	Methyl hexadecanoate	1.0±0.13 a	0.9±0.12 a	0.9±0.11 a	0.9±0.11 a
MEDN732	RICINOLEIC ACID	1.0±0.10 a	0.7±0.14 b	0.9±0.18 ab	0.9±0.05 ab
MEDN734	Cis-3-Hexenylacetate	1.0±0.30 a	0.8±0.32 ab	0.9±0.02 a	0.9±0.12 a
MEDN750	(±)12-HEPE [(±)-12-hydroxy-5Z,8Z,10E,14Z,17Z-eicosapentaenoic acid]	1.0±0.55 a	0.0±0.02 b	0.1±0.13 b	0.0±0.03 b
MEDN751	(±)12-HETE [(±)12-hydroxy-5Z,8Z,10E,14Z-eicosatetraenoic acid]	1.0±0.45 a	0.0±0.0 b	0.0±0.01 b	0.0±0.0 b
MEDN752	(±)15-HEPE [(±)-15-hydroxy-5Z,8Z,11Z,13E,17Z-eicosapentaenoic acid]	1.0±0.30 a	0.0±0.0 b	0.0±0.01 b	0.0±0.0 b
MEDN754	(±)17-HDHA [(±)17-hydroxy-4Z,7Z,10Z,13Z,15E,19Z-docosahexaenoic acid]	1.0±0.49 a	0.0±0.0 b	0.0±0.01 b	0.0±0.0 b
MEDN755	(±)17-HETE [(±)17-hydroxy-5Z,8Z,11Z,14Z-eicosatetraenoic acid]	1.0±0.90 ab	1.2±0.94 a	0.0±0.0 b	0.0±0.0 b
MEDN756	(±)18-HEPE [(±)-18-hydroxy-5Z,8Z,11Z,14Z,16E-eicosapentaenoic acid]	1.0±0.31 a	0.0±0.0 b	0.0±0.08 b	0.0±0.0 b
MEDN757	(±)18-HETE [(±)18-hydroxy-5Z,8Z,11Z,14Z-eicosatetraenoic acid]	1.0±0.99 a	0.7±0.46 ab	0.5±0.56 b	0.1±0.33 a
MEDN758	(±)4-HDHA [(±)4-hydroxy-5E,7Z,10Z,13Z,16Z,19Z-docosahexaenoic acid]	1.0±0.32 a	0.7±0.61 ab	0.6±0.16 ab	0.5±0.27 ab
MEDN759	(±)5-HEPE [(±)-5-hydroxy-6E,8Z,11Z,14Z,17Z-eicosapentaenoic acid]	1.0±0.31 a	0.4±0.37 b	0.3±0.08 b	0.5±0.37 ab
MEDN760	(±)5-HETE [(±)5-hydroxy-6E,8Z,11Z,14Z-eicosatetraenoic acid]	1.0±0.46 a	0.9±0.59 a	0.7±0.25 ab	0.7±0.28 ab
MEDN761	(±)7-HDHA [(±)7-hydroxy-4Z,8E,10Z,13Z,16Z,19Z-docosahexaenoic acid]	1.0±0.58 a	0.7±0.53 ab	0.5±0.52 ab	0.5±0.57 ab
MEDN763	(±)9-HETE [(±)-9-hydroxy-5Z,7E,11Z,14Z-eicosatetraenoic acid]	1.0±0.59 a	0.0±0.0 b	0.0±0.04 b	0.0±0.00 b
MEDN764	11(S)-HETE [11S-hydroxy-5Z,8Z,12E,14Z-eicosatetraenoic acid]	1.0±0.93 a	0.5±0.33 ab	0.8±0.90 a	0.2±0.15 b
MEDN765	11,12-EET [(±)11,(12)-epoxy-5Z,8Z,14Z-eicosatrienoic acid]	1.0±0.93 a	0.5±0.35 ab	0.8±0.90 a	0.2±0.15 b
MEDN767	12,13-EpOME [(±)12(13)epoxy-9Z-octadecenoic acid]	1.0±0.81 ab	0.5±0.45 b	1.5±0.35 a	0.9±0.66 ab
MEDN768	13-oxoODE [13-oxo-9Z,11E-octadecadienoic acid]	1.0±0.96 a	0.4±0.02 ab	0.4±0.22 ab	0.5±0.05 ab
MEDN769	14(S)-HDHA [14S-hydroxy-4Z,7Z,10Z,12E,16Z,19Z-docosahexaenoic acid]	1.0±0.44 a	0.1±0.04 b	0.3±0.03 ab	0.1±0.03 b
MEDN770	14,15-EET [(±)14(15)-epoxy-5Z,8Z,11Z-eicosatrienoic acid]	1.0±0.57 a	0.6±0.44 ab	0.9±0.11 a	0.3±0.34 b
MEDN777	5,6-DiHETrE [(±)5,6-dihydroxy-8Z,11Z,14Z-eicosatrienoic acid]	1.0±0.77 b	2.2±0.55 a	1.3±0.55 ab	1.0±0.45 b
MEDN781	6 keto-PGF1α [6-oxo-9α,11α,15S-trihydroxy-prost-13E-en-1-oic acid]	1.0±0.44 a	0.1±0.06 b	0.2±0.14 b	0.1±0.01 b
MEDN783	9,10-EpOME [(±)9,10-epoxy-12Z-octadecenoic acid]	1.0±0.38 a	0.6±0.32 ab	0.7±0.14 ab	0.8±0.20 ab
MEDN784	9-oxoODE [9-oxo-10E,12Z-octadecadienoic acid]	1.0±0.88 a	0.4±0.06 b	0.5±0.11 b	0.5±0.08 b
MEDN790	PDX [10(S),17(S)-dihydroxy-4Z,7Z,11E,13Z,15E,19Z-docosahexaenoic acid]	1.0±0.63 a	0.5±0.45 b	1.0±0.28 a	0.8±0.45 ab
MEDN793	PGE2 [9-oxo-11α,15S-dihydroxy-prosta-5Z,13E-dien-1-oic acid]	1.0±0.44 a	0.2±0.29 b	0.3±0.48 b	0.1±0.11 bc
MEDN794	PGF1α [9α,11α,15S-trihydroxy-prost-13E-en-1-oic acid]	1.0±0.26 b	2.0±0.37 ab	2.8±0.86 a	1.5±0.06 ab
MEDN795	PGF2α [9α,11α,15S-trihydroxy-prosta-5Z,13E-dien-1-oic acid]	1.0±0.91 a	0.4±0.33 b	1.0±1.36 a	0.2±0.19 b
MEDN807	Myristic acid	1.0±0.38 a	0.3±0.41 b	0.7±0.37 ab	0.8±0.47 ab
MEDP336	Lysopc 14:0	1.0±0.52 a	0.4±0.34 b	0.6±0.32 ab	0.6±0.27 ab
MEDP338	Lysopc 16:0	1.0±0.34 a	0.8±0.49 ab	1.1±0.18 a	0.9±0.35 ab
MEDP340	Lysopc 16:1	1.0±0.57 a	0.3±0.24 b	0.8±0.25 ab	0.9±0.50 a
MEDP342	Lysopc 18:0	1.0±0.41 ab	1.1±0.79 ab	1.3±0.25 a	1.1±0.50 ab
MEDP344	Lysopc 18:1	1.0±0.45 b	0.8±0.57 b	1.8±0.74 a	1.9±0.85 a
MEDP346	Lysopc 18:2	1.0±0.38 ab	0.7±0.40 b	1.4±0.25 a	1.4±0.38 a
MEDP348	Lysopc 20:0	1.0±0.62 b	0.9±0.88 b	1.4±0.83 a	1.5±0.89 a
MEDP350	Lysopc 20:1	1.0±0.43 b	0.9±0.59 b	1.5±0.44 a	1.6±1.07 a
MEDP352	Lysopc 20:2	1.0±0.50 b	0.8±0.56 b	1.7±0.82 ab	2.2±1.19 a
MEDP428	Cholesterol	1.0±0.46 a	0.6±0.39 ab	0.7±0.14 ab	1.0±0.43 a
MEDP429	Punicic Acid	1.0±0.12 a	0.1±0.07 b	0.2±0.13 b	0.1±0.08 b
MEDP434	Lysopc 17:0	1.0±0.67 a	0.7±0.60 ab	0.8±0.48 ab	1.2±0.47 a
MEDP494	Lysopc 15:0	1.0±0.47 a	0.4±0.29 b	0.7±0.24 ab	0.6±0.27 ab
MEDP498	Lysopc 18:3	1.0±0.50 a	0.9±0.72 ab	1.1±0.32 a	0.9±0.46 ab
MEDP513	Hexadecanamide	1.0±0.36 ab	0.9±0.56 ab	0.9±0.29 ab	1.4±0.67 a
MEDP537	PAF C-16	1.0±0.42 b	1.2±0.79 ab	1.3±0.13 a	1.2±0.47 ab
MEDP561	Farnesene	1.0±0.29 a	0.8±0.06 ab	0.8±0.18 ab	0.8±0.09 ab
MEDP574	Oleamide	1.0±0.35 a	0.7±0.48 ab	0.8±0.34 ab	1.3±0.51 a
MEDP578	alpha-Cadinene	1.0±0.17 a	0.7±0.19 ab	0.8±0.11 ab	1.1±0.34 a
MEDP585	Stearidonic Acid	1.0±0.91 a	0.2±0.10 b	0.3±0.26 b	1.1±0.46 a
MEDP590	p-Mentha-1,3,8-triene	1.0±0.61 ab	0.4±0.17 b	0.5±0.33 b	1.5±0.73 a
MEDP603	Cuminaldehyde	1.0±0.39 ab	0.5±0.52 b	1.2±0.30 a	1.3±0.60 a
MEDP618	2-Methylbutyroylcarnitine	1.0±0.78 a	0.2±0.25 b	0.9±0.25 a	0.9±0.35 a
MEDP631	Dimethyl fumarate	1.0±0.28 ab	0.8±0.41 b	1.0±0.20 ab	1.3±0.40 a
MEDP632	beta-Cubebene	1.0±0.20 a	0.8±0.08 ab	0.7±0.12 ab	0.9±0.27 a
MEDP638	LysoPE(16:1(9Z)/0:0)	1.0±0.73 a	0.4±0.26 b	0.7±0.10 ab	0.8±0.55 ab
MEDP656	Isoamyl butyrate	1.0±0.17 a	0.9±0.09 a	0.8±0.05 ab	0.9±0.04 a
MEDP657	EthylHeptanoate	1.0±0.17 a	0.9±0.09 a	0.8±0.05 ab	0.9±0.05 a
MEDP658	Ethyl dodecanoate	1.0±0.02 ab	0.9±0.07 b	1.0±0.09 ab	1.1±0.13 a
MEDP676	Butyl 3-methylbutanoate	1.0±0.62 a	0.7±0.13 ab	0.6±0.07 ab	0.7±0.21 ab
MEDP695	Methyl tetradecanoate	1.0±0.17 a	0.8±0.10 ab	0.9±0.16 a	0.9±0.14 a
MEDP706	9,12-Octadecadienoicacid (9Z,12Z)-, 2,3-dihydroxypropyl ester	1.0±0.35 a	0.7±0.28 ab	0.5±0.14 b	0.8±0.24 ab
MEDP710	Hexyl butyrate	1.0±0.13 a	0.9±0.13 a	0.95±0.12 a	1.0±0.14 a
MEDP783	10-UNDECENOIC ACID	1.0±0.28 a	0.8±0.41 ab	1.2±0.21 a	1.3±0.37 a
MEDP806	Monopalmitin	1.0±0.07 a	0.9±0.08 ab	1.0±0.07 a	1.0±.011 a
MEDP817	PROPYL HEXANOATE	1.0±0.55 a	0.5±0.05 b	0.7±0.18 ab	0.6±0.07 ab
Note: The abundance of each compound in CK group was set as 1. Different lower-case letters beside the values indicate significant difference among the groups (p < 0.05).
