# Supplementary figures and images for: Compound green tea (CGT) regulates lipid metabolism in high-fat diet induced mice
Source: Royal Society of Chemistry journal article supplement (doi:10.1039/d2ra02831j), 2022-01-01

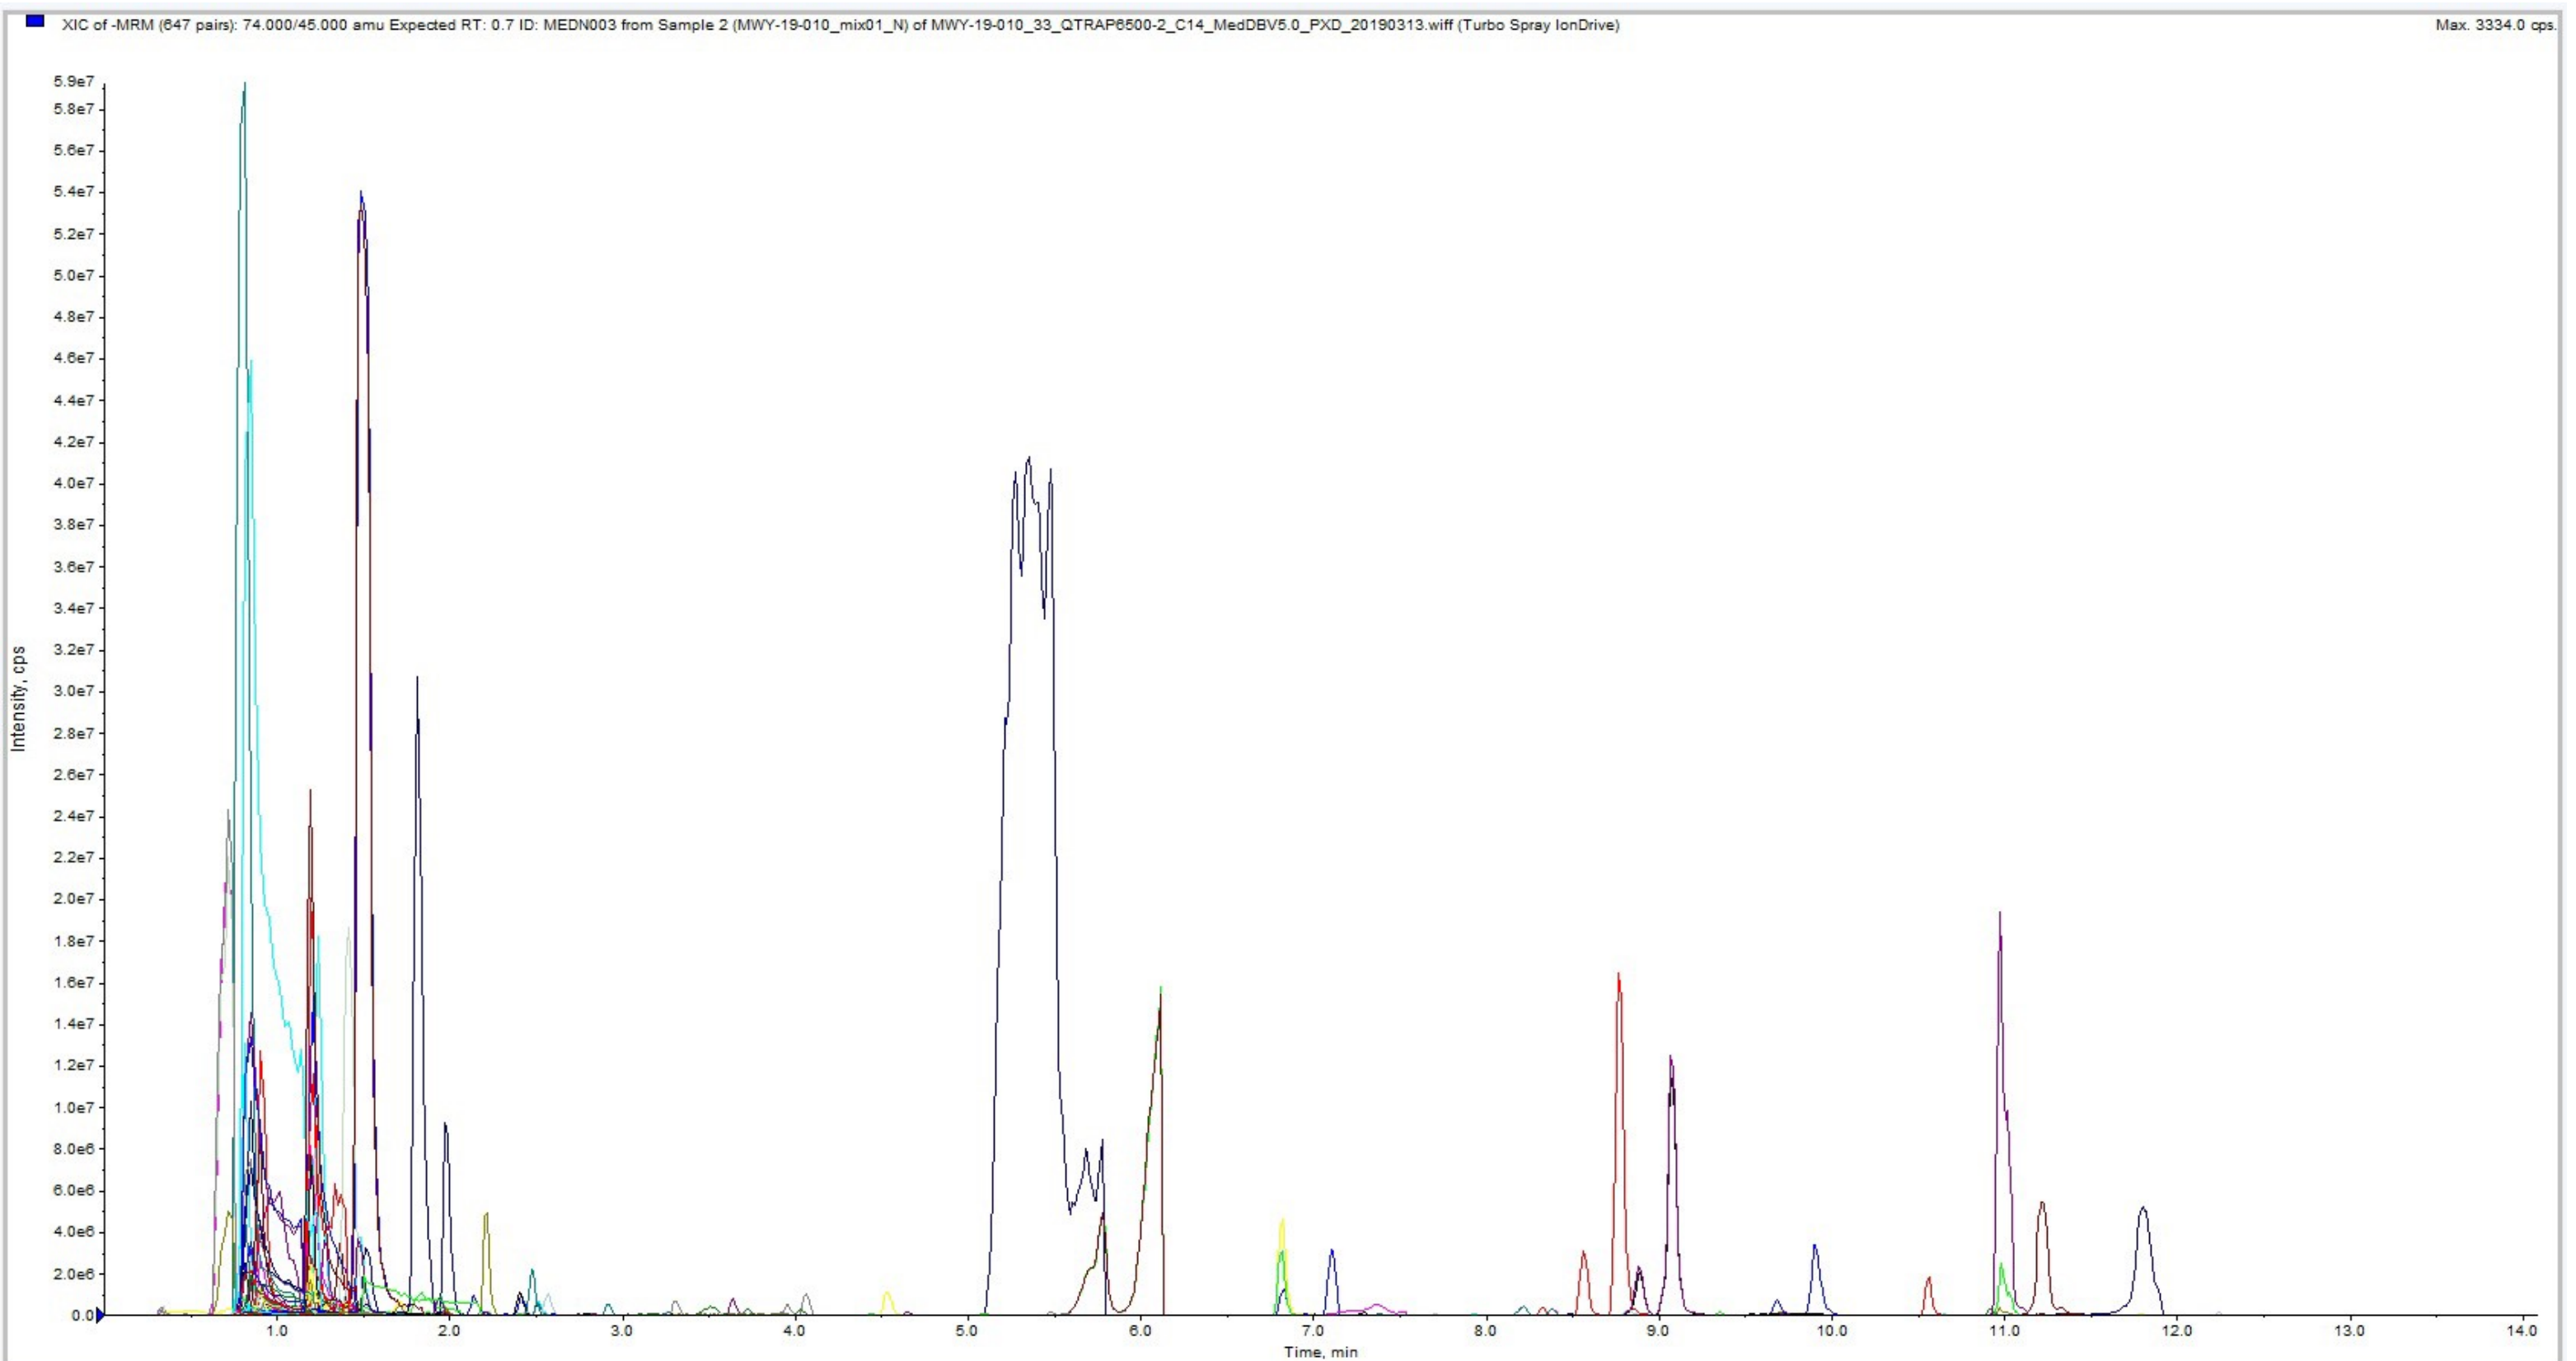

Supplement: d2ra02831j2.pdf [file d2ra02831j2.pdf]

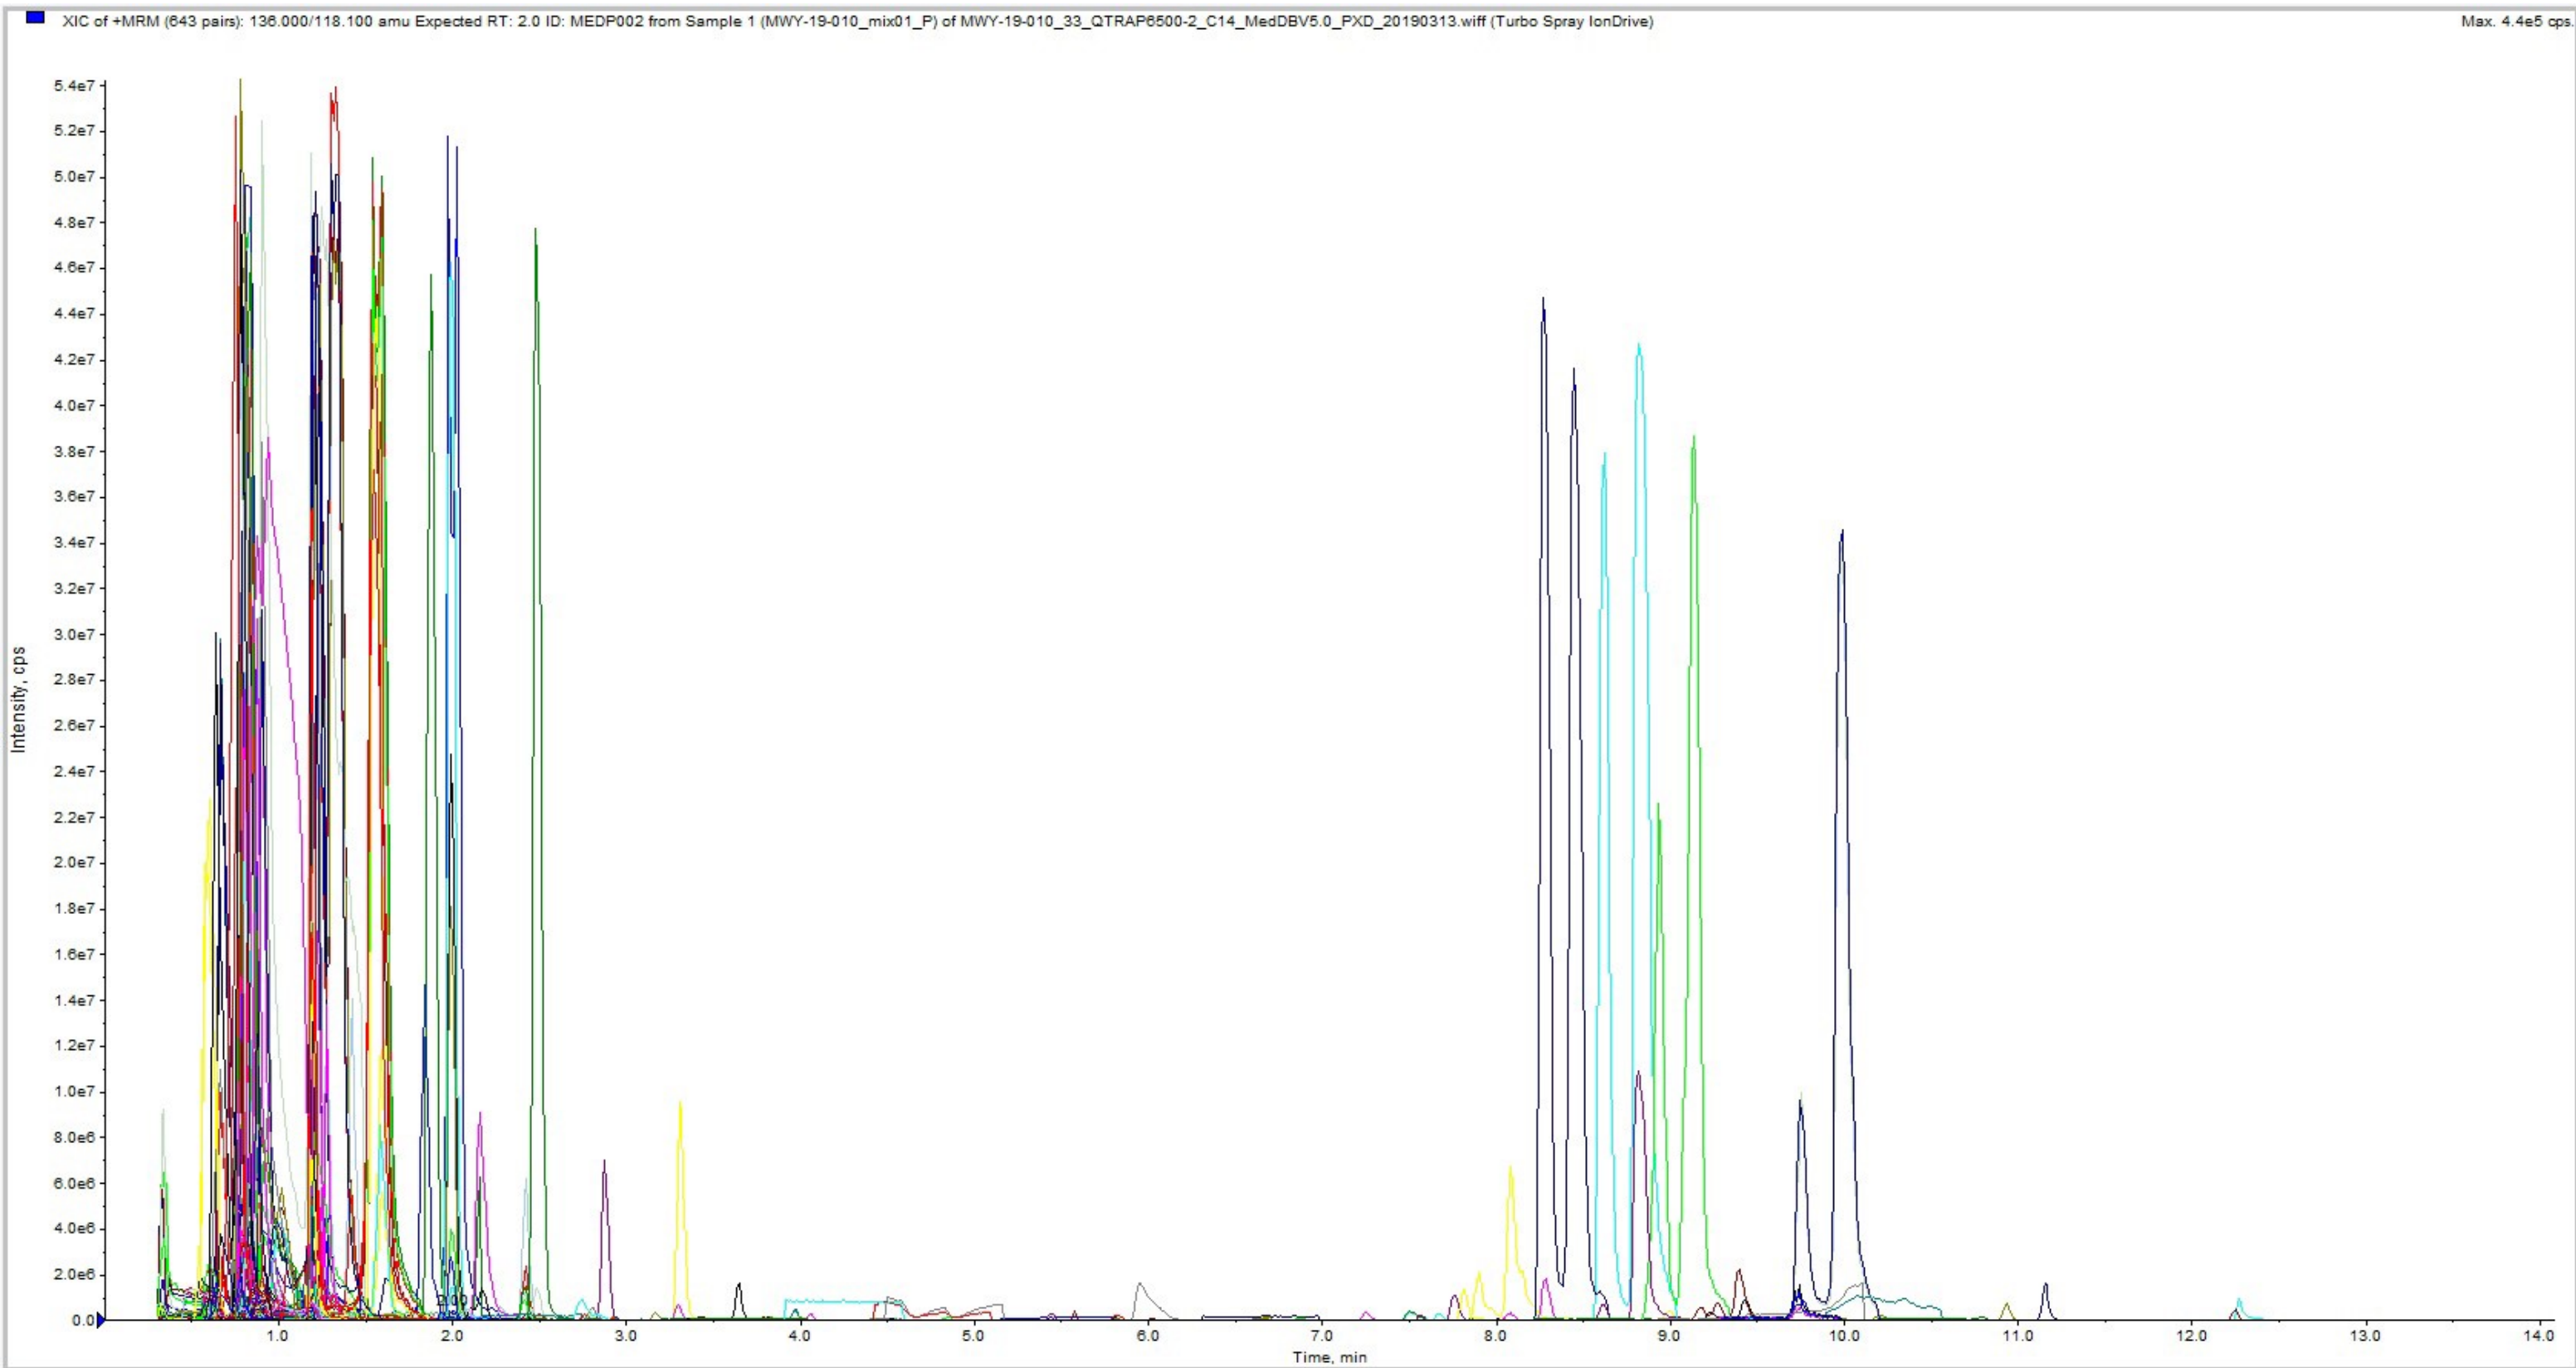

Supplement: d2ra02831j3.pdf [file d2ra02831j3.pdf]

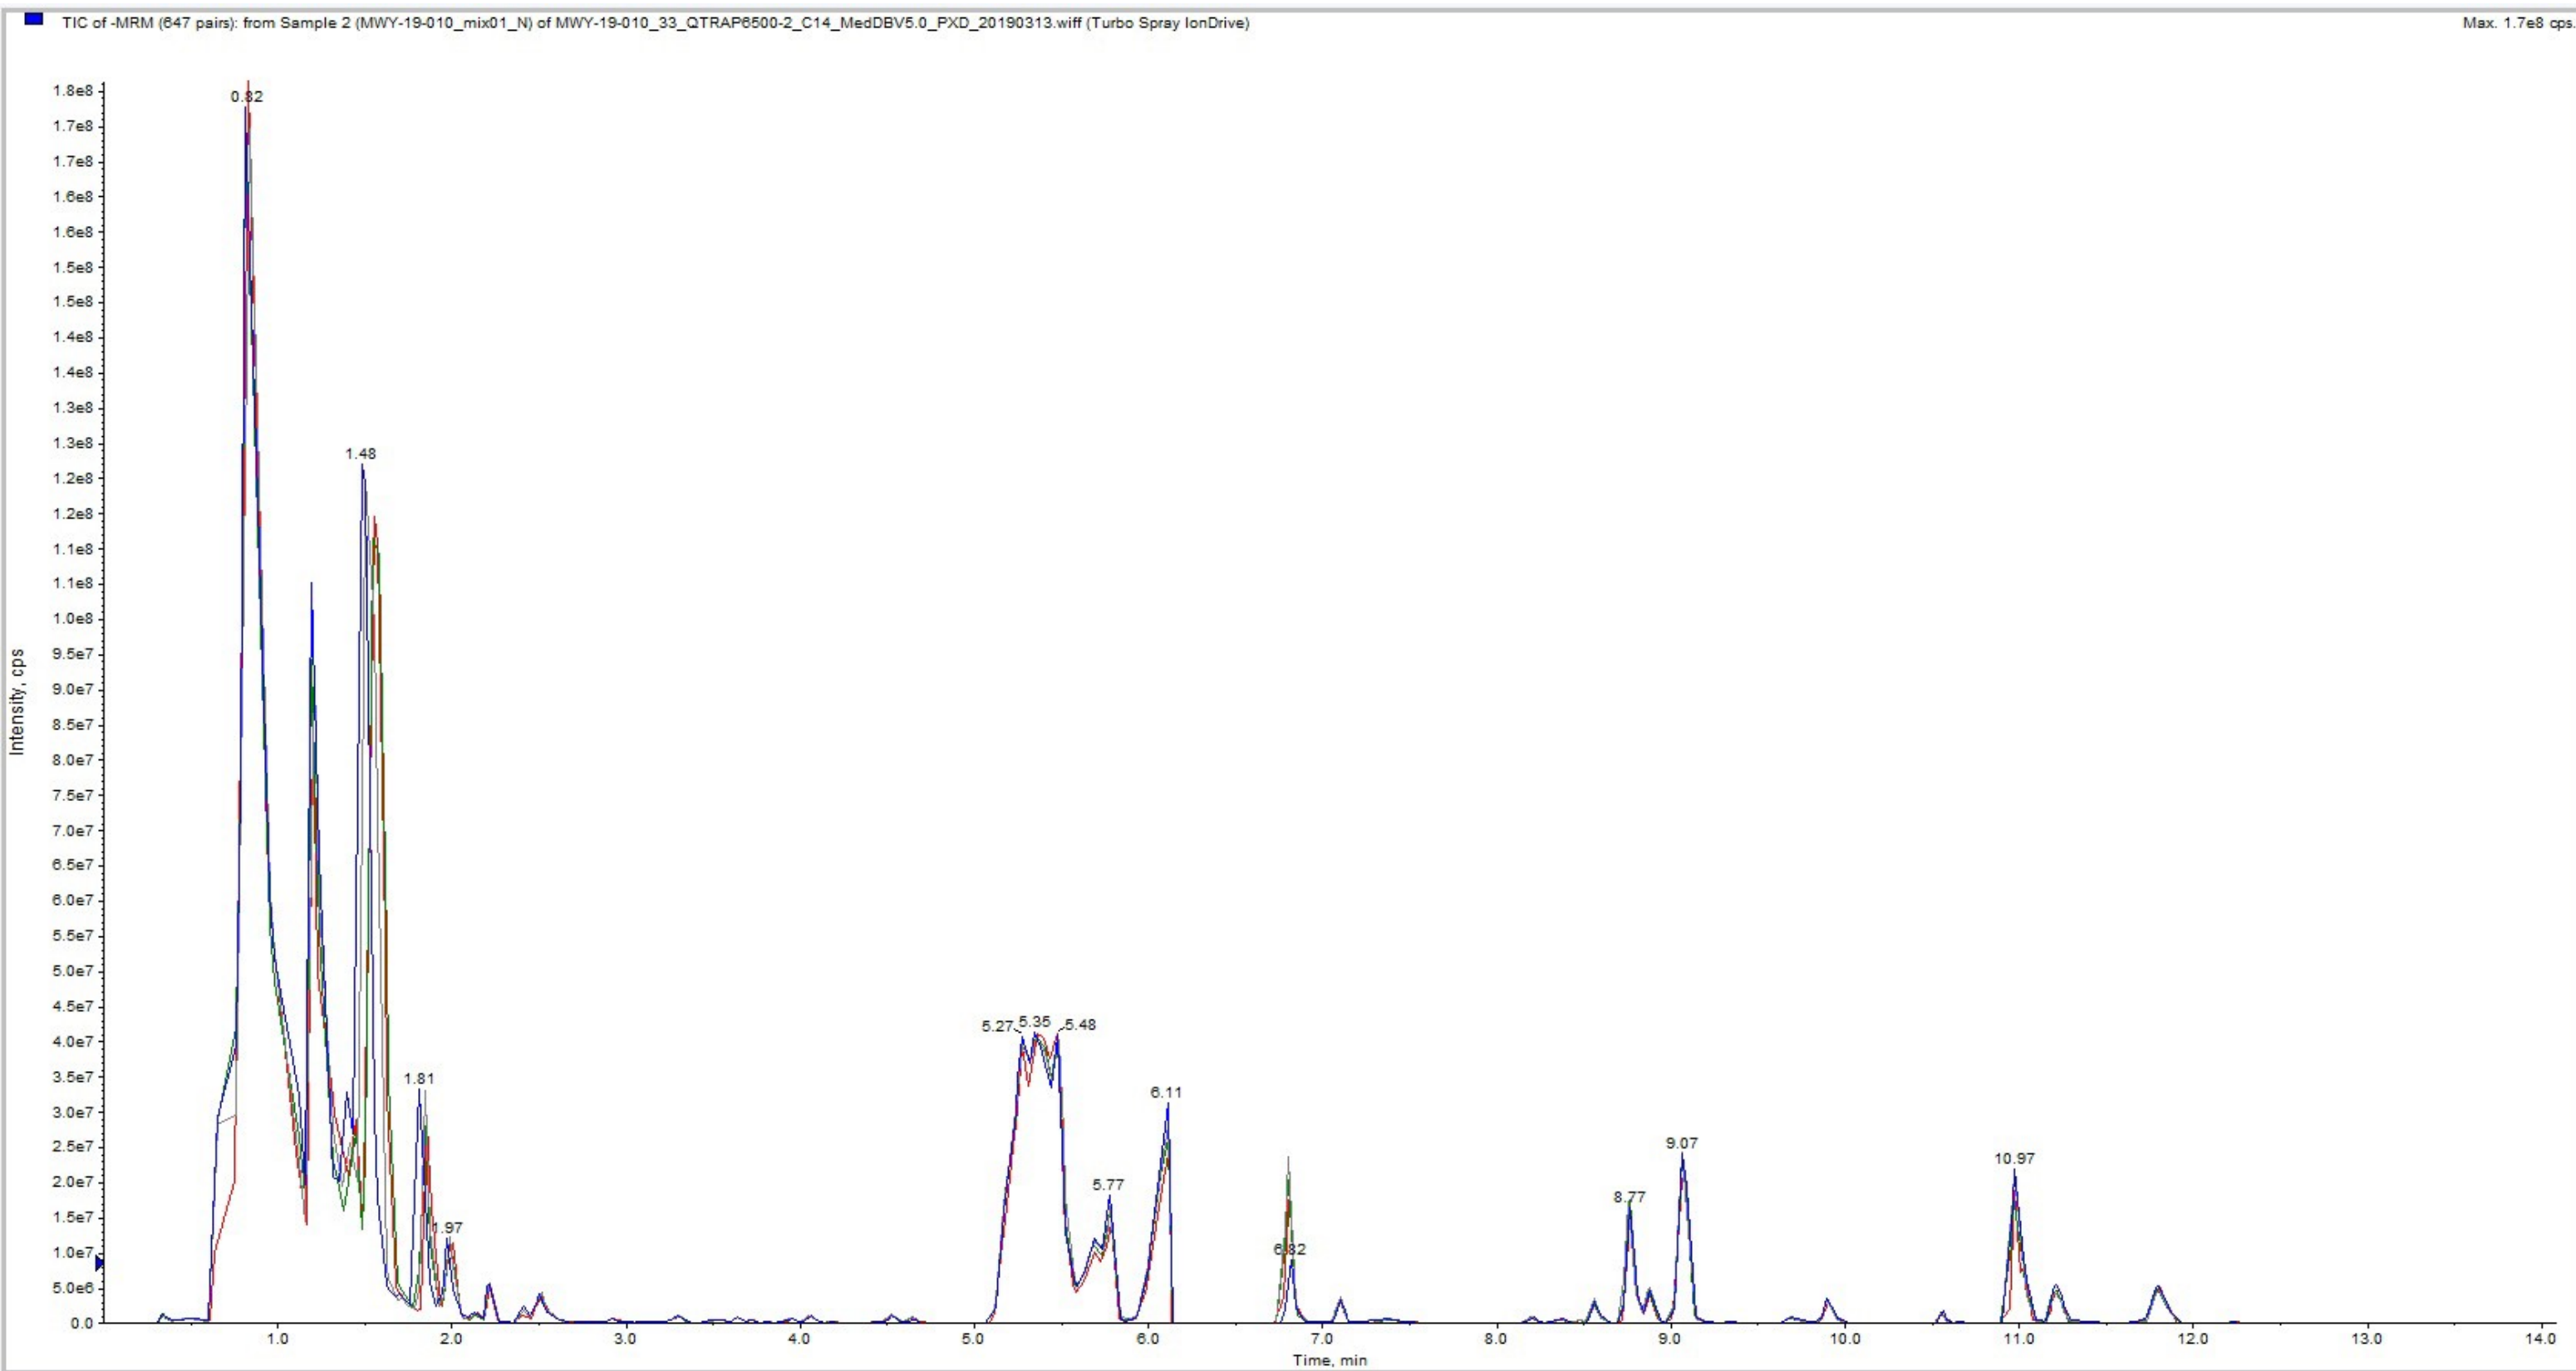

Supplement: d2ra02831j4.pdf [file d2ra02831j4.pdf]

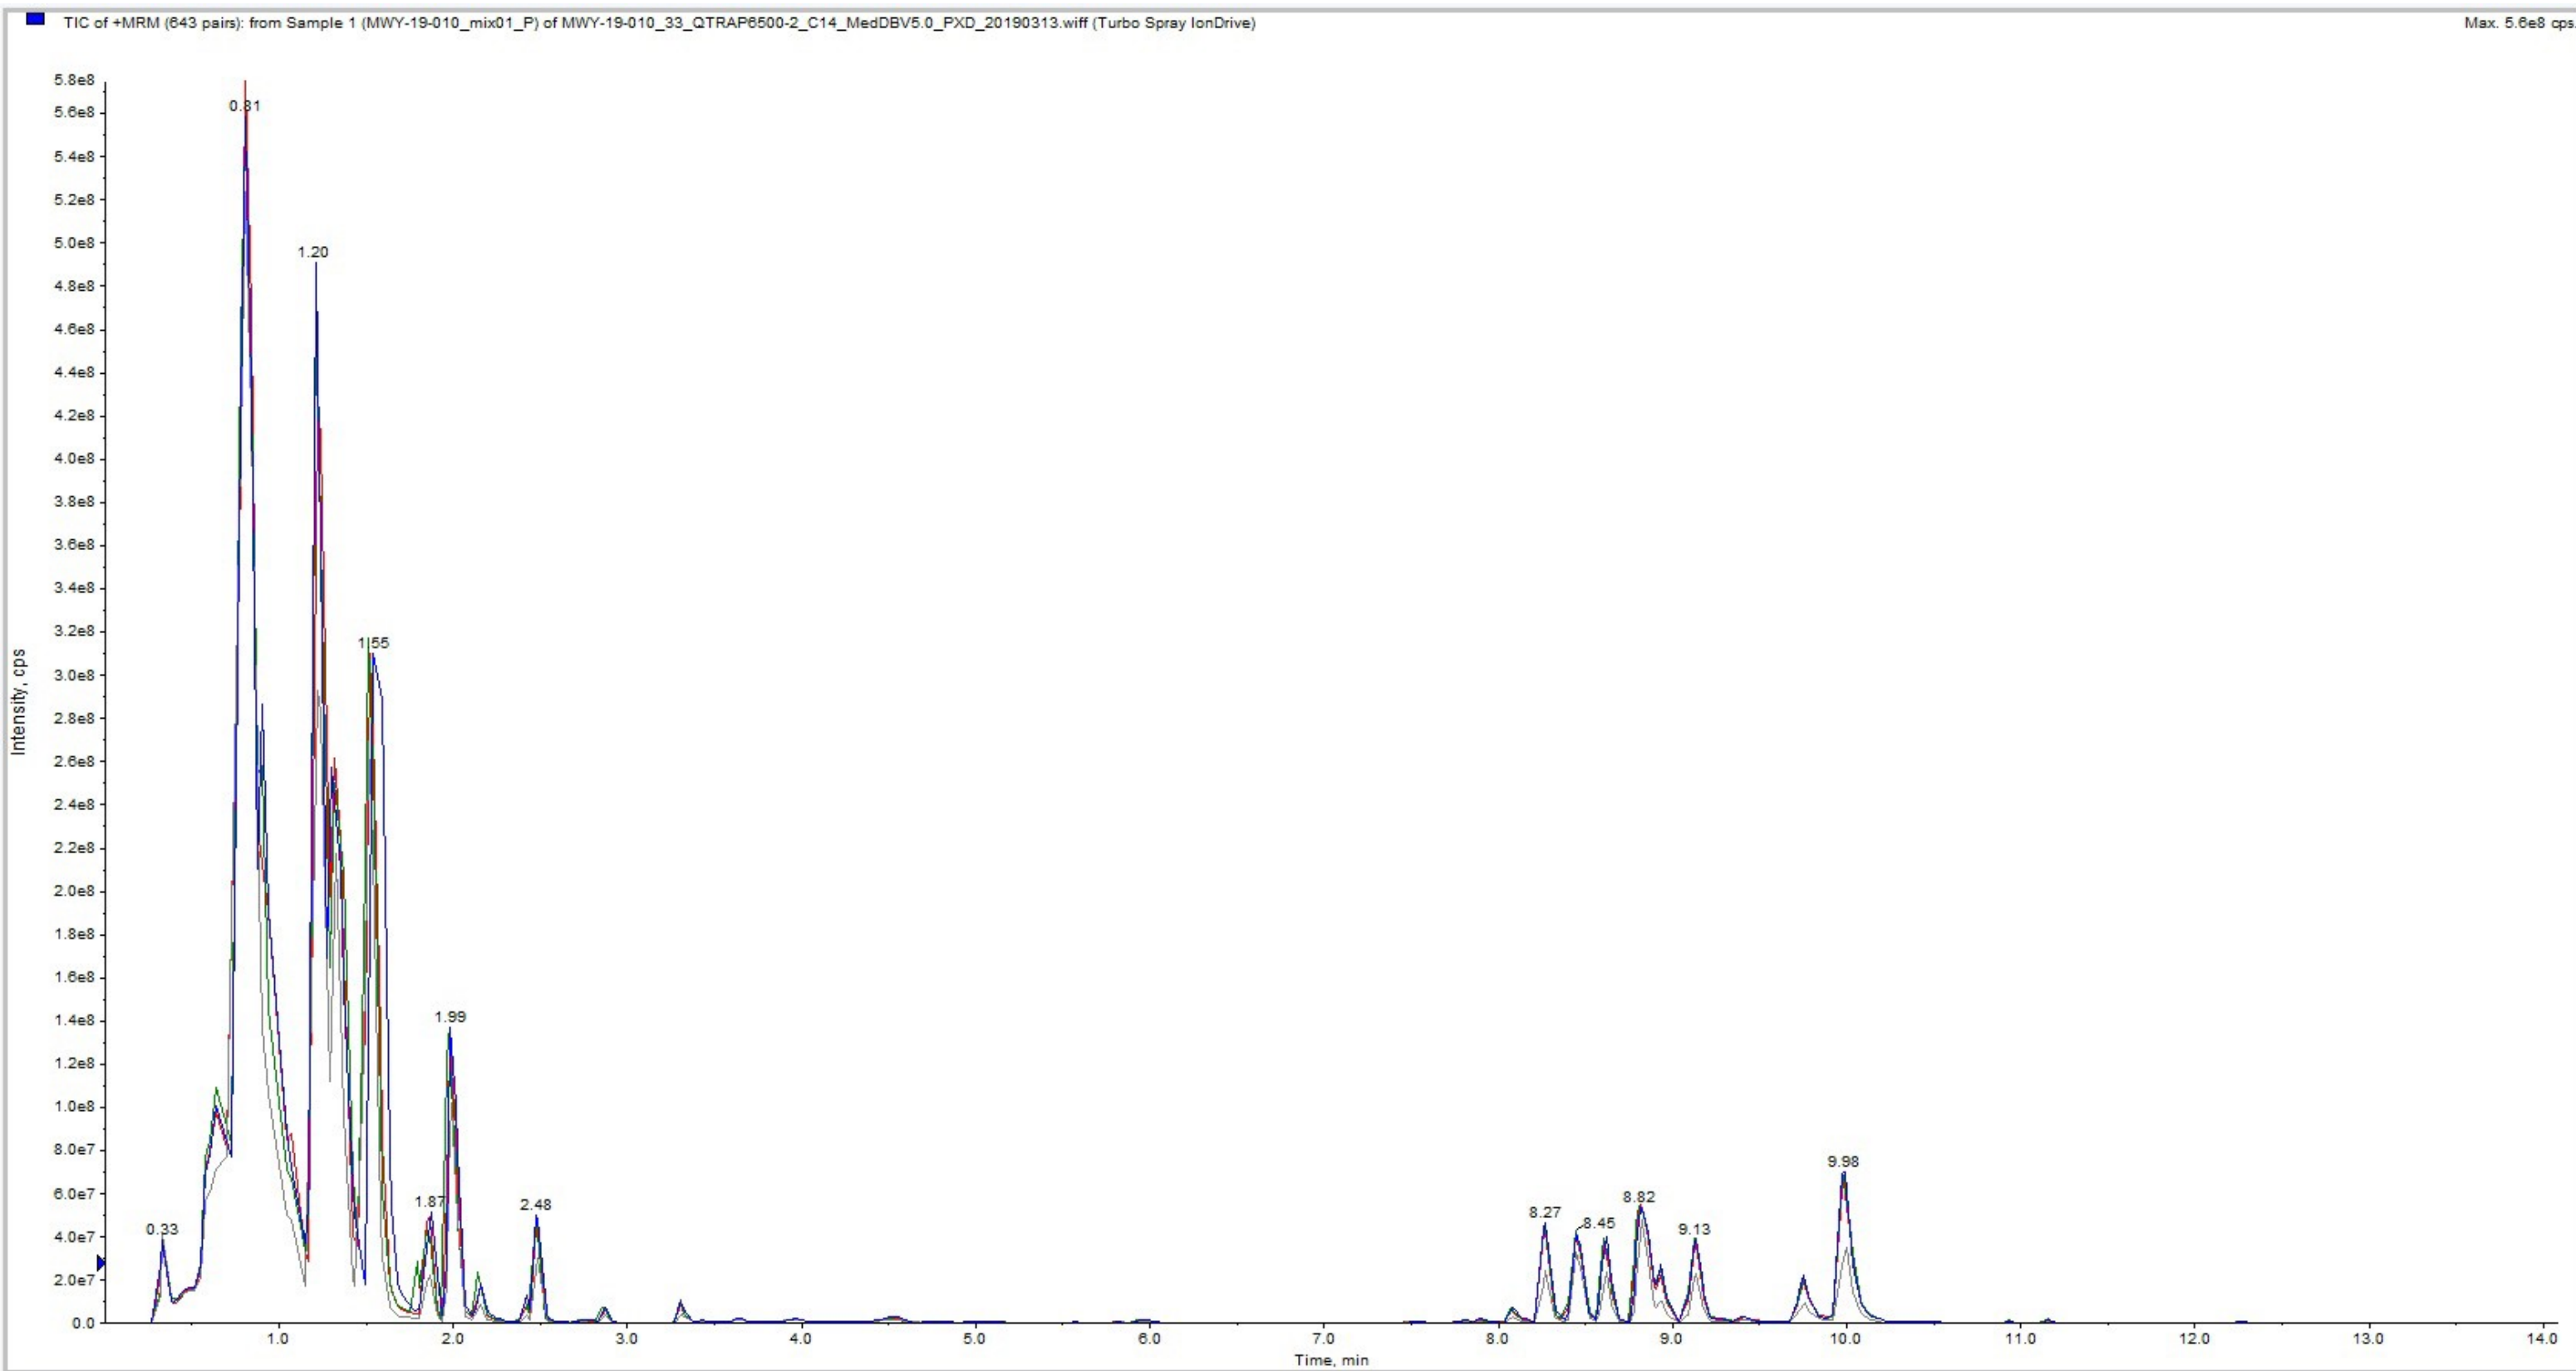

Supplement: d2ra02831j5.pdf [file d2ra02831j5.pdf]
